# Supplementary material
Source: PubMed Central journal article supplement (PMC9477817)
Supplement: 41396_2022_1284_MOESM1_ESM.pdf [file 41396_2022_1284_MOESM1_ESM.pdf]

## Supplementary material:

# Pathogenic fungus uses volatiles to entice male flies into fatal matings with infected female cadavers

### Authors

Andreas Naundrup<sup>\*1</sup>, Björn Bohman<sup>2</sup>, Charles A. Kwadha<sup>2</sup>, Annette B. Jensen<sup>1</sup>, Paul G. Becher<sup>2</sup>, Henrik H. De Fine Licht<sup>\*1</sup>

<sup>1</sup>Section for Organismal Biology, Department of Plant and Environmental Science, University of Copenhagen, Denmark

<sup>2</sup>Department of Plant Protection Biology, Swedish University of Agricultural Sciences, Alnarp, Sweden

\*Author for correspondence: Email: ah@plen.ku.dk, Tel: +45 42408353, Email: hhdefinlicht@plen.ku.dk, Tel: +45 35320097, Address: Section for Organismal Biology, Department of Plant and Environmental Science, University of Copenhagen, Thorvaldsensvej 40, 1871 Frederiksberg, Denmark

## Supplementary Figure 1

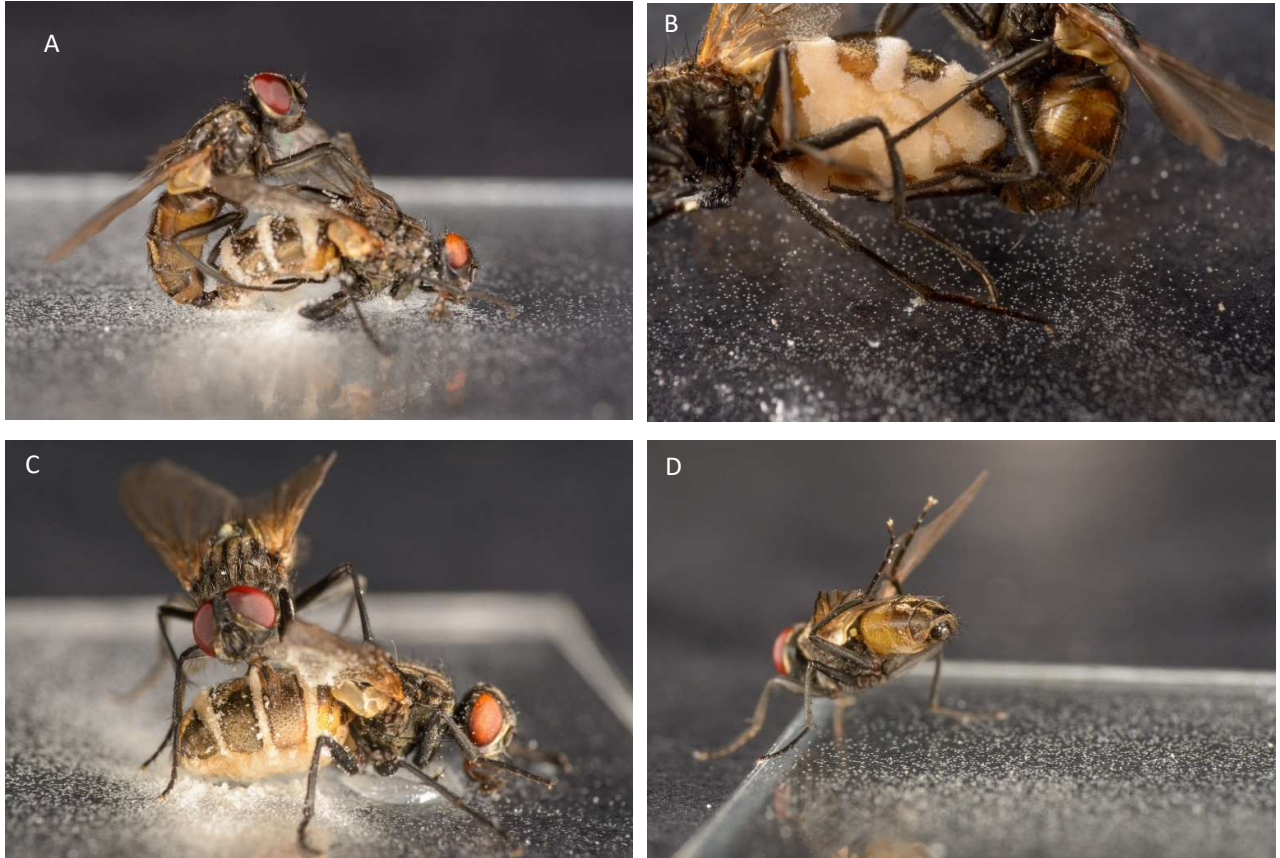

**Supplementary figure 1. Housefly behavior towards *E. muscae* sporulating cadavers.** **a.** A healthy, male housefly attempting to mate with an *E. muscae* sporulating housefly cadaver. **b.** Male attempting to mate with a sporulating female housefly cadaver. The male visibly extends his aedeagus to engage in mating. **c.** A housefly extending its proboscis and inspecting the sporulating cadaver. This behavior was exhibited towards both male and female cadavers and conidia alone. The cadaver is fixated to the glass surface with a small amount of petroleum jelly (Vaseline) on the ventral side of the thorax. **d.** Healthy male housefly engaging in grooming behaviour after being in contact with cadaver and conidia. Here, several conidia have already attached themselves to legs and abdomen. In all photos conidia can be seen as a white powder primarily on surfaces and the cadaver, but also on the male's abdomen and legs. Photos: Filippo Castelucci.

## Supplementary Figure 2

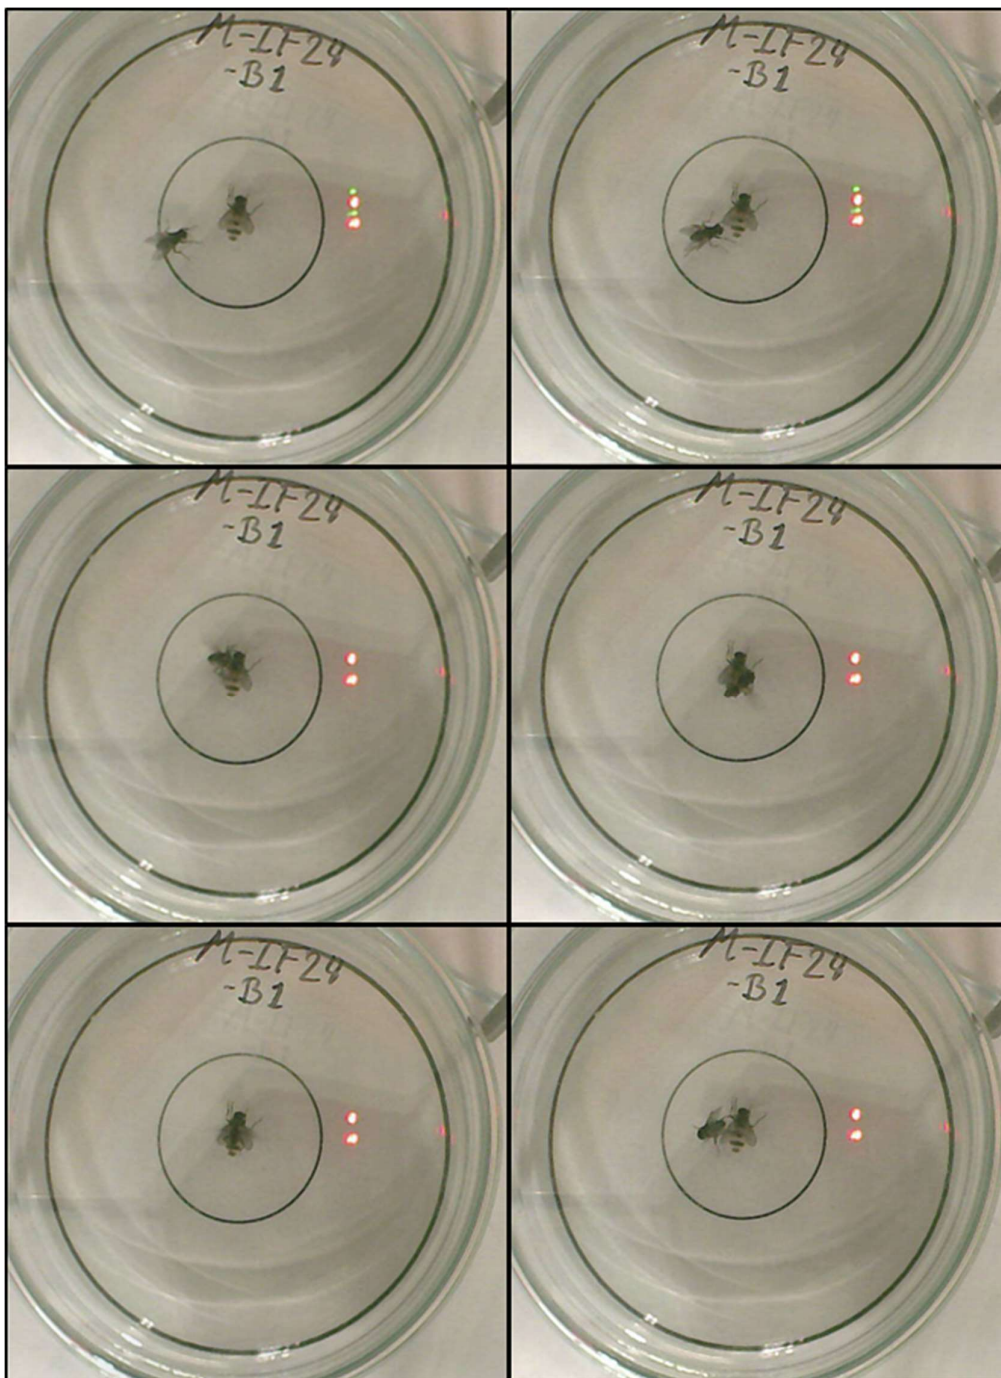

**Supplementary figure 2. Time-course pictures of an attempted mating in the mating activity experiment.** A single cadaver is fixated in the center of a glass arena (Petri dish). The arena is placed on top of a printed sheet of paper, denoting the center (cadaver), an inner ring (radius = 16 mm), which denotes when the subject is “in vicinity” and an outer ring to indicate the outer borders of the arena. After acclimating to the arena, the male will usually first interact with the cadaver by physical contact. A mating attempt occurs when the male approaches the cadaver, usually from the sides or rear, and jumps onto the cadaver, accompanied by excessive wing flicking. Then the male attempts to connect his aedeagus with the tip of the cadaver’s abdomen.

### Supplementary figure 3

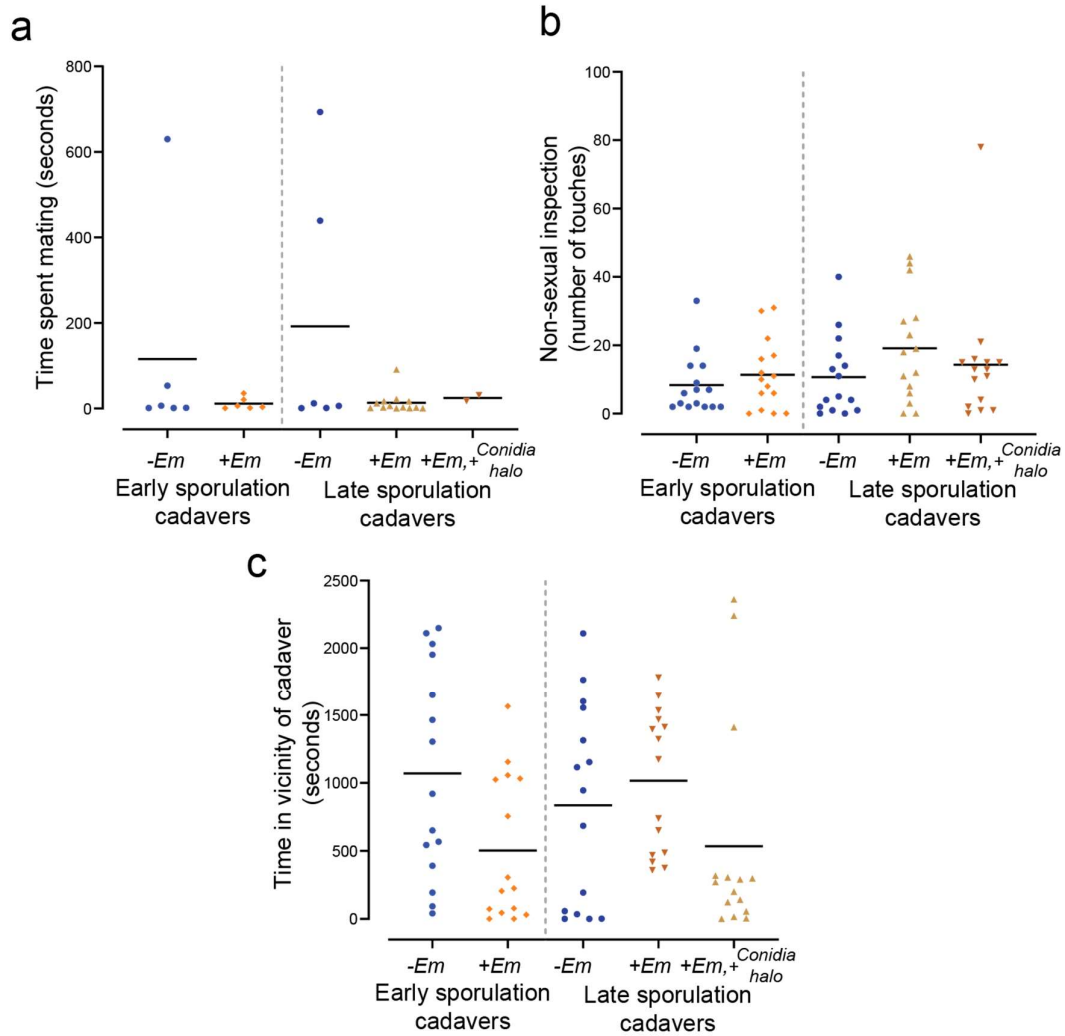

**Supplementary figure 3. Male behaviour towards female cadavers. a.** Time spent mating (seconds). Male on uninfected female early control (-Em, n = 15), +Em: Male on infected female, early sporulation stage (+Em, n = 15), Male on uninfected female, late control (-Em, n = 15), Male on infected female, late sporulation stage (+Em, n = 15), Male on infected female, late sporulation stage with spores around the cadaver (+Em, +*Conidia halo*, n = 15) **b.** Number of non-sexual physical cadaver inspections (number of touches). **c.** Time spent in vicinity of cadaver (radius: 16 mm). Horizontal black lines show the mean.

## Supplementary Figure 4

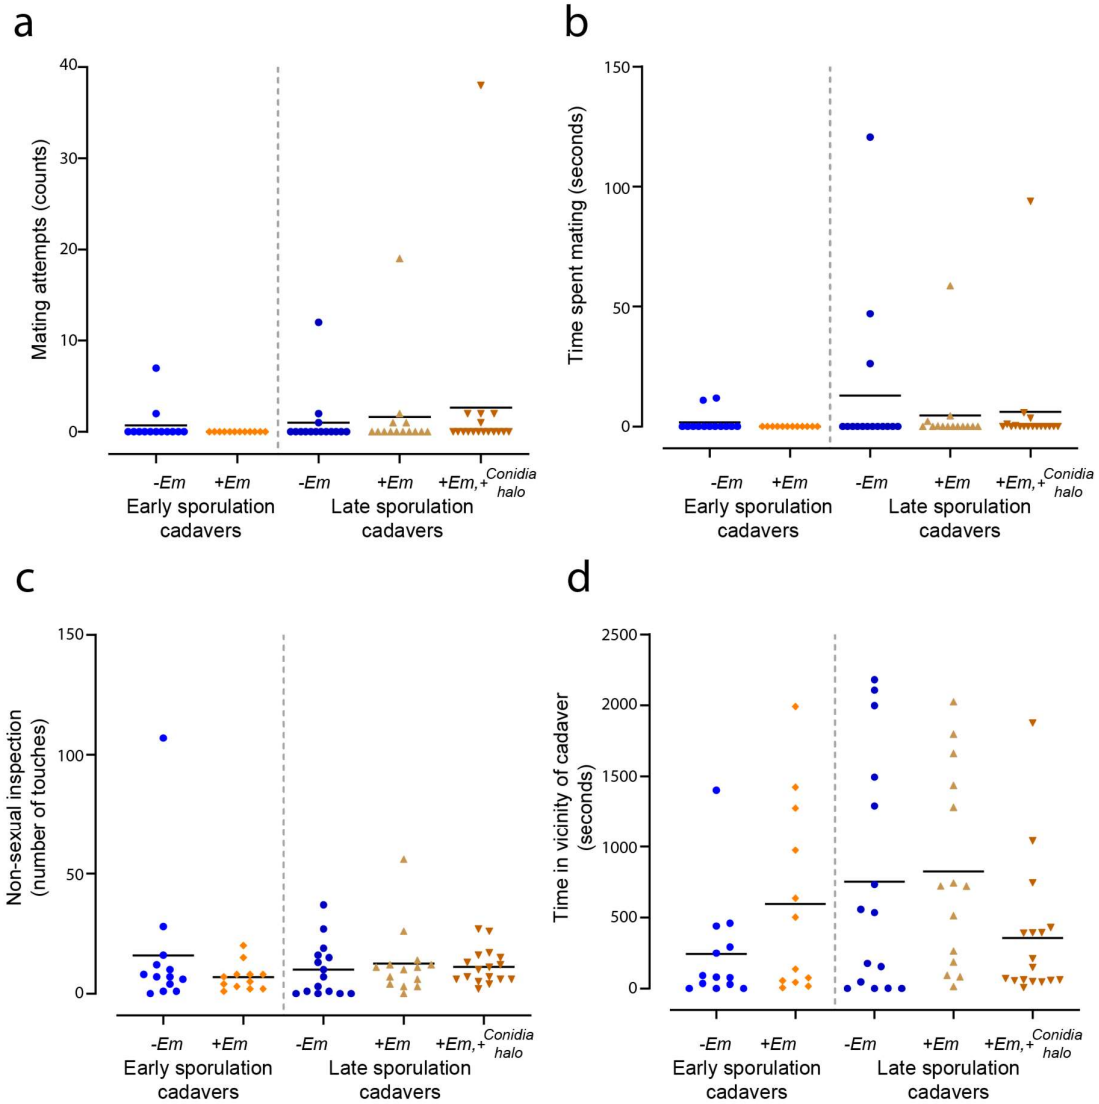

**Supplementary figure 4. Male on male mating behaviour.** **a.** Number of mating attempts measured per trial. Male on uninfected male early control (-Em, n =13), +Em: Male on infected male, early sporulation stage (+Em, n=12), Male on uninfected male, late control (-Em, n=15), Male on infected male, late sporulation stage (+Em, n=14), and Male on infected male, late sporulation stage with halo of conida around the cadaver (+Em, +*Conidia halo*, n=17) **b.** Time spent mating (seconds) **c.** Non-sexual inspections (counts of touches), **d.** Time spent in vicinity (radius: 16 mm) of the male cadaver. Horizontal black lines show the mean.

### Supplementary Figure 5

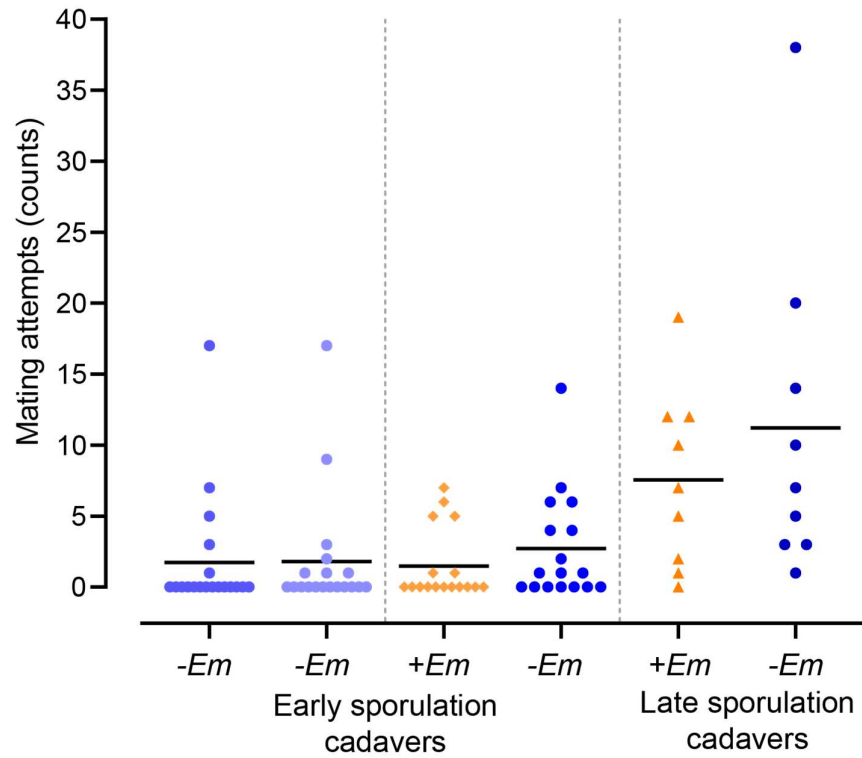

**Supplementary figure 5. Petri dish 2-choice experiment.** One male was allowed to choose between two female cadavers. In the first subset (left), the male had to choose between two uninfected, freeze-killed early controls ( $n = 19$ ). In the second subset (middle), a male was allowed to choose between an uninfected female control ( $-Em$ ), and an *E. muscae*-infected cadaver ( $+Em$ ) in an early sporulation stage ( $n = 17$ ). In the last subset (right), a male was allowed to choose between a freeze-killed, uninfected control ( $-Em$ ) and an *E. muscae*-infected cadaver ( $+Em$ ) in a late sporulation stage ( $n = 9$ ). There was no significant differences in the number of copulation attempts in any of the experiments. Horizontal black lines show the mean.

### Supplementary Figure 6

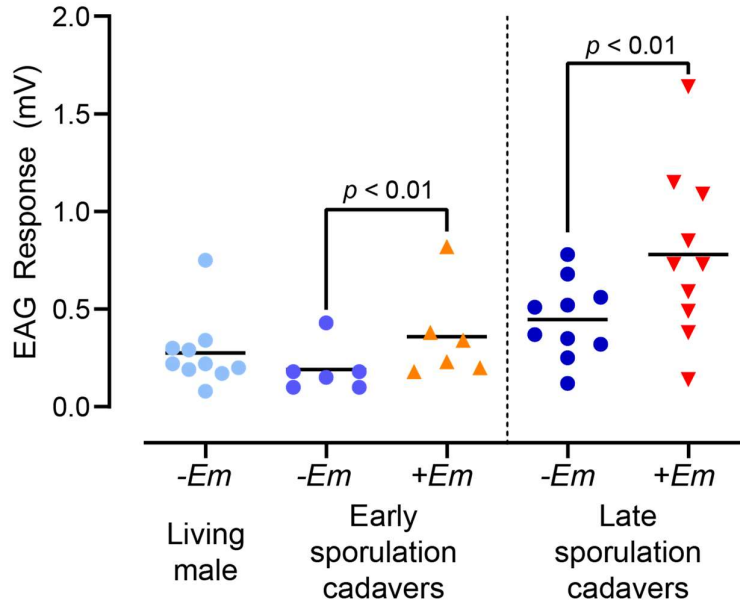

**Supplementary figure 6. Male EAG response (mV) to volatiles from male cadavers.** EAG responses (mV) to stimulus pipettes containing either uninfected, living males (-Em, n = 10), uninfected (-Em, n = 6) or infected (+Em, n = 6) early sporulation male cadavers, or uninfected (-Em, n = 10) or infected (+Em, n = 10) late sporulation male cadavers. There was a significant effect of treatment on the EAG response when comparing +Em to -Em for both early (linear mixed-effects model (LMM),  $p < 0.01$ ,  $t = 3.835$ ) and late sporulation cadavers (LMM,  $p < 0.01$ ,  $t = 3.887$ ). Horizontal black lines show the mean.

## Supplementary Figure 7

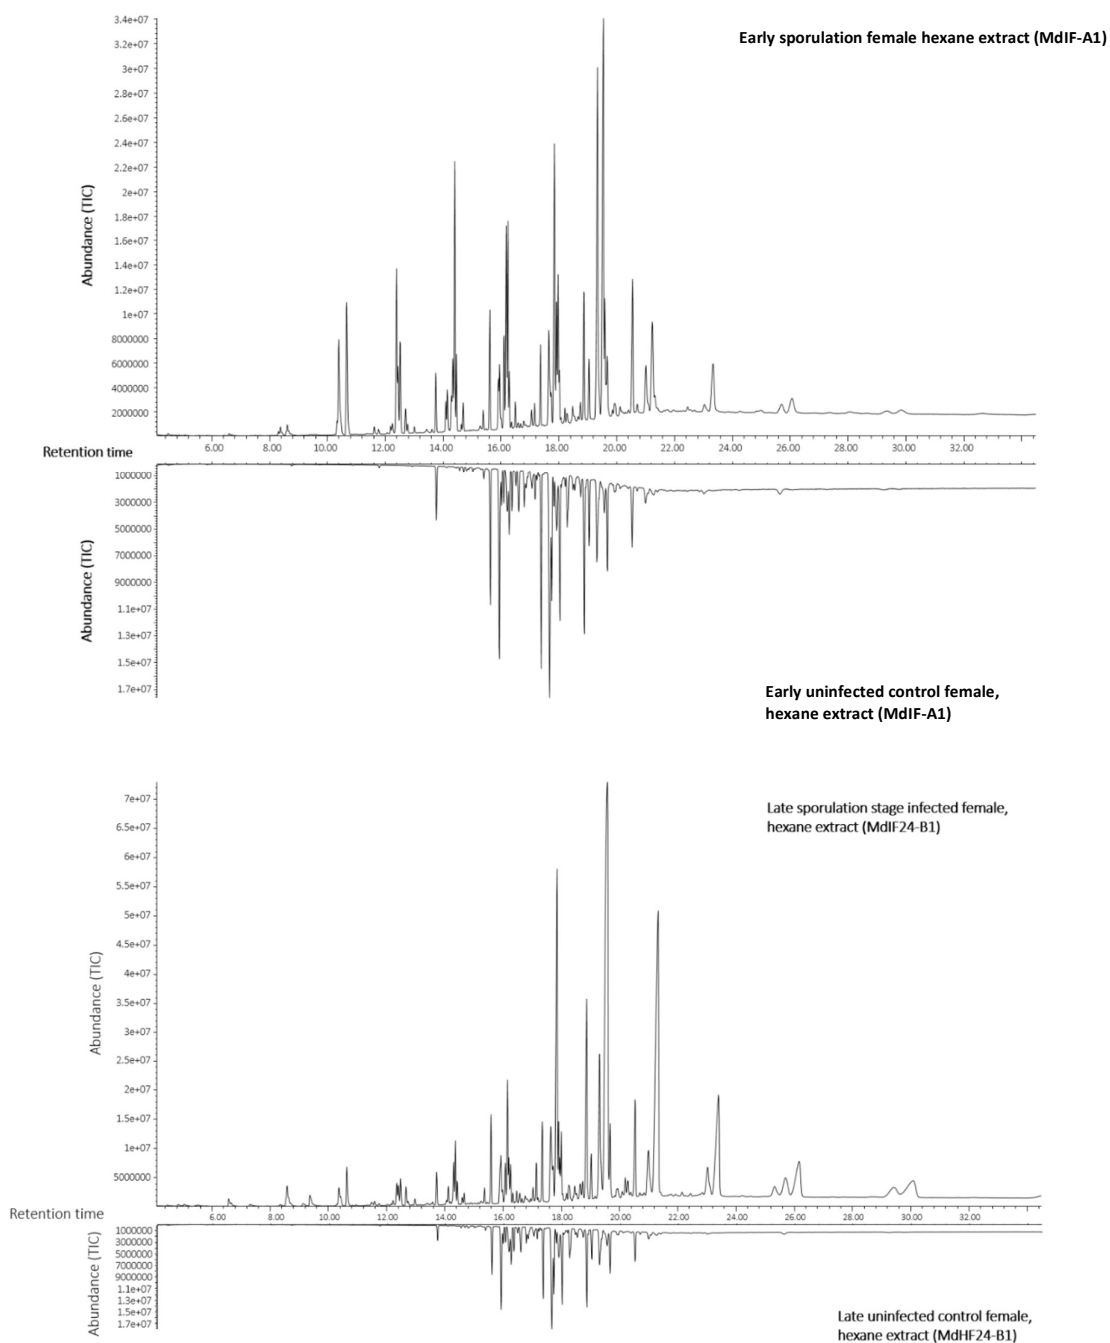

**Supplementary figure 7. Gas chromatography mass spectrometry (GC-MS) representative Total Ion Chromatograms (TIC) of early and late sporulation stage infected female cadavers.** GC-MS analysis conducted on cuticular hexane extracts of *E. muscae* early sporulation stage infected and uninfected female cadavers (top), and late sporulation stage infected and uninfected female control (bottom). Late killed cadavers had been incubated at high humidity for 25-30 hours, to prevent desiccation during sporulation.



Supplementary figure 8

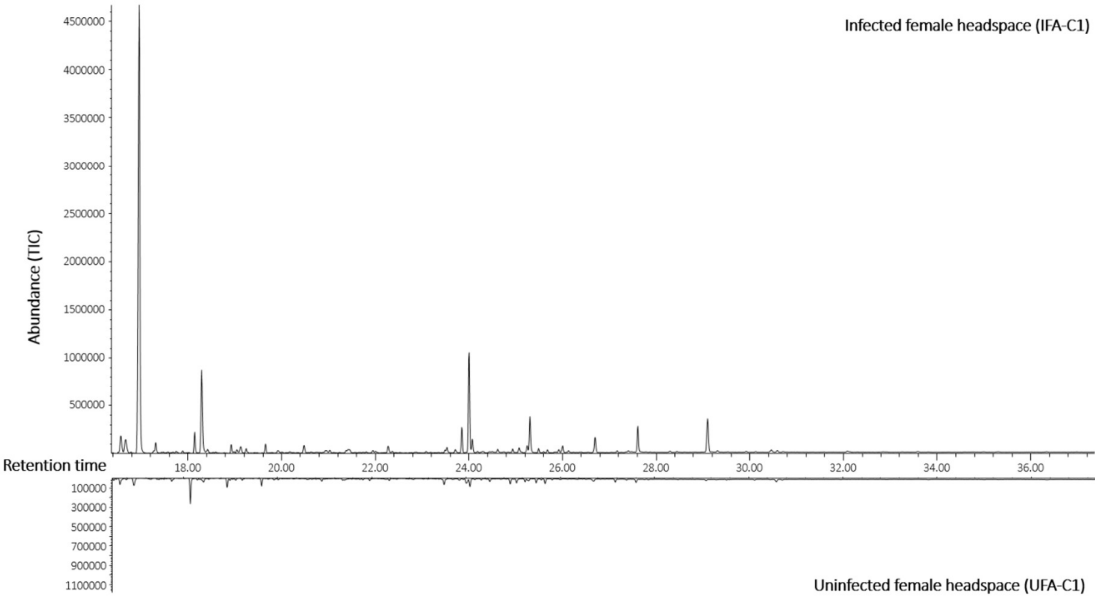

**Supplementary figure 8. Gas chromatography mass spectrometry (GC-MS) representative Total Ion Chromatograms (TIC) of headspace samples from *E. muscae* sporulating females (top) and uninfected females (bottom).** Chromatogram of headspace sampled as an aeration from female, sporulating houseflies (top). Headspace from uninfected female houseflies can be seen in the bottom.

### Supplementary figure 9

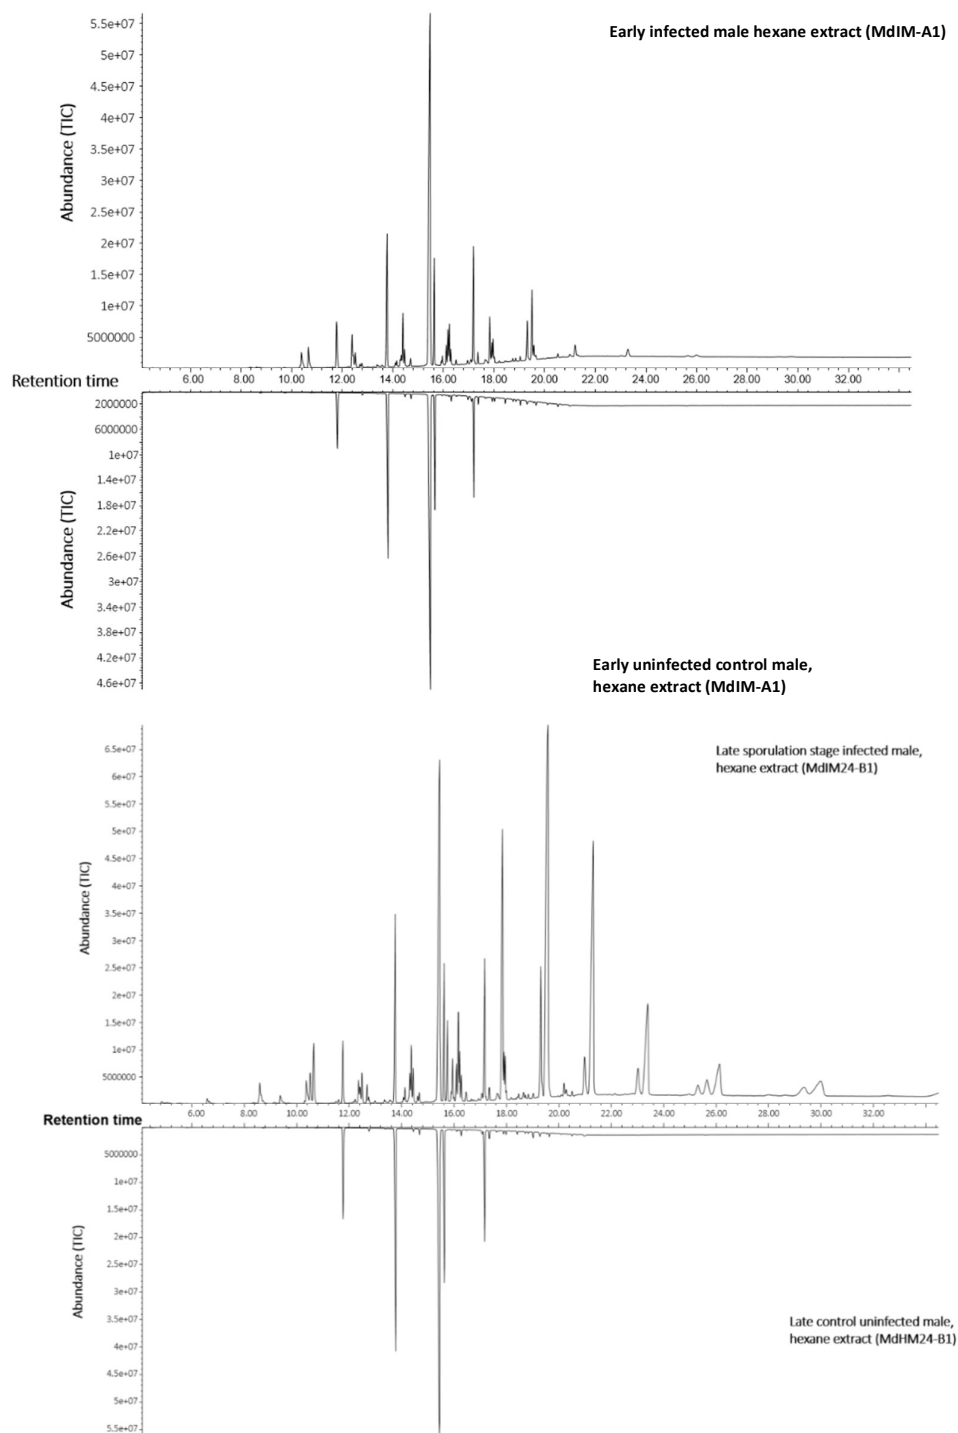

**Supplementary figure 9. Representative Total Ion Chromatograms (TIC) of cuticular extracts of early (top) and late (bottom) sporulation stage infected male cadaver and an uninfected male control. Late killed cadavers had been incubated at high humidity for 25-30 hours, to prevent desiccation during sporulation.**

### Supplementary figure 10

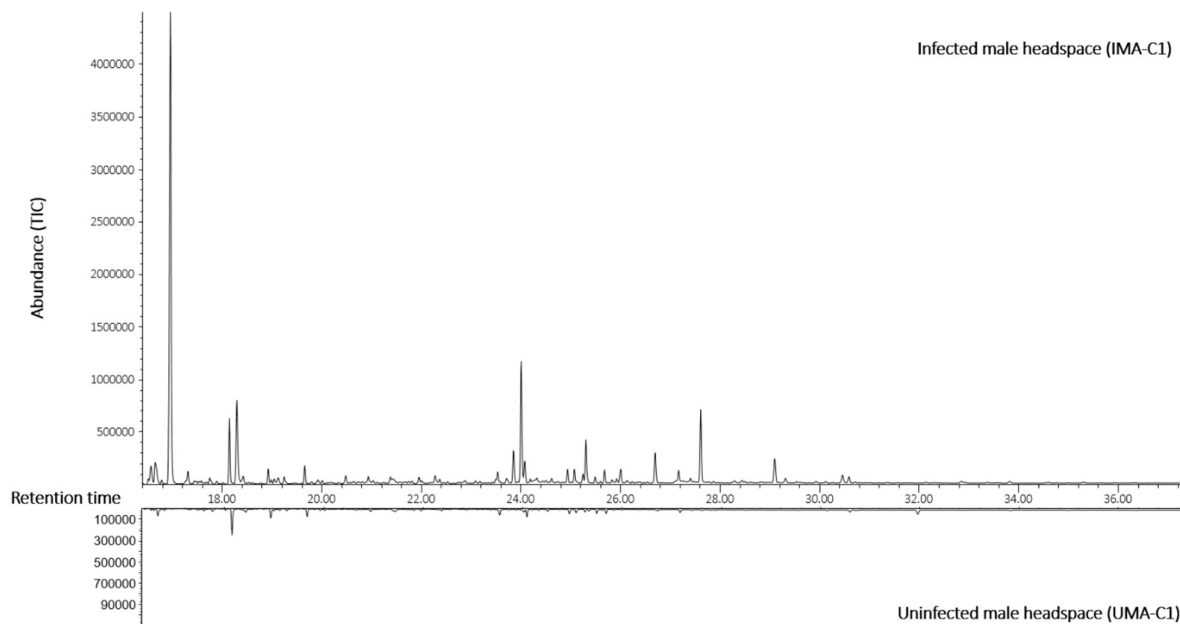

**Supplementary figure 10. Representative Total Ion Chromatogram (TIC) of headspace from male, sporulating houseflies (top) and from uninfected male houseflies (bottom).**

### Supplementary figure 11

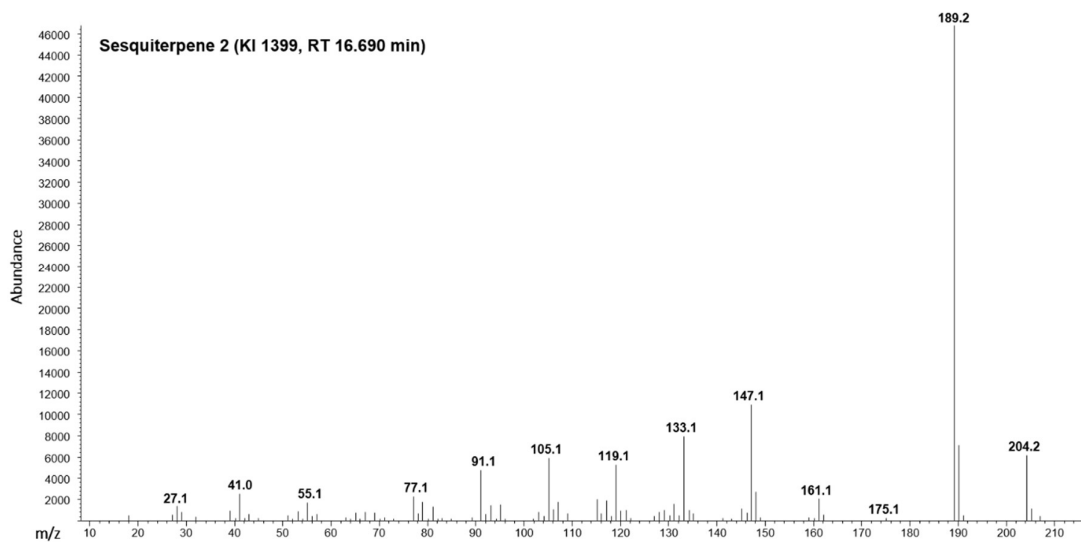

Supplementary figure 11. Mass spectrum of “Sesquiterpene 2”, one of the two unidentified GC-EAD active sesquiterpene compounds.

### Supplementary figure 12

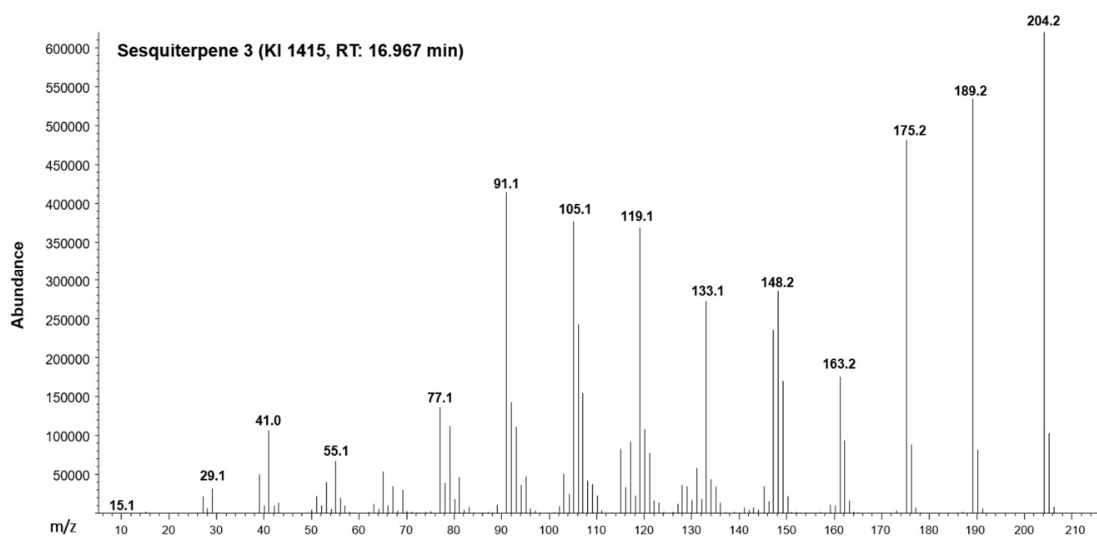

Supplementary figure 12. Mass spectrum of “Sesquiterpene 3”, the largest occurring compound in headspace from any *E. muscae* sample.

### Supplementary figure 13

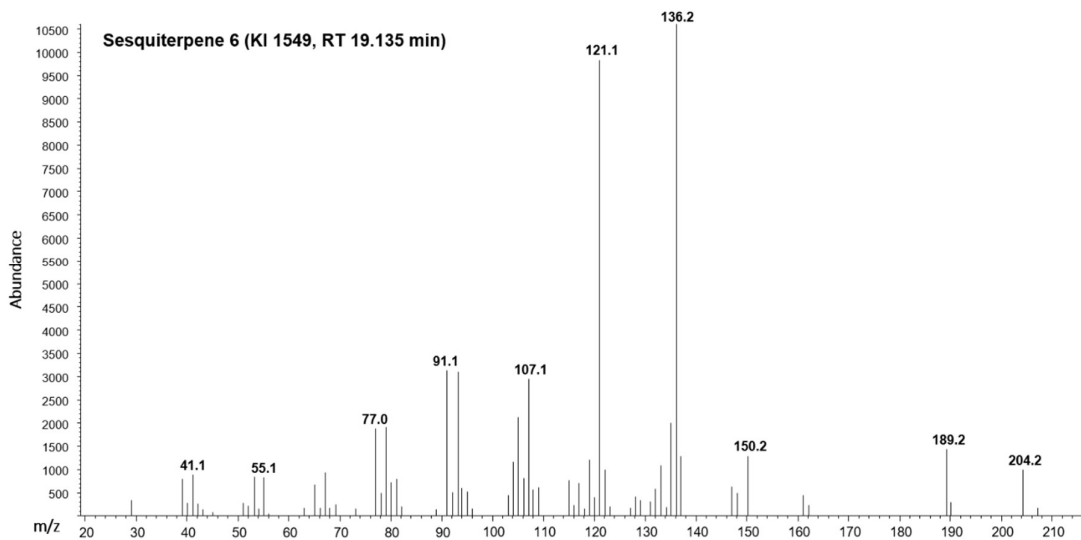

Supplementary figure 13. Mass spectrum of "Sesquiterpene 6", the second GC-EAD active sesquiterpene.

### Supplementary figure 14

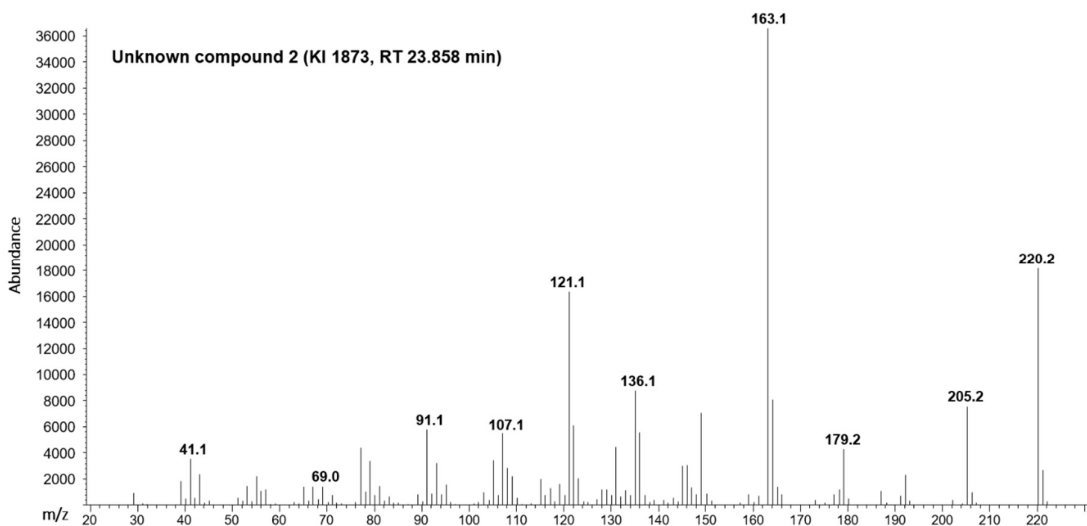

Supplementary figure 14. Mass spectrum of "Unknown compound 2", one of two GC-EAD compounds with unknown structure and identity.

## Supplementary figure 15

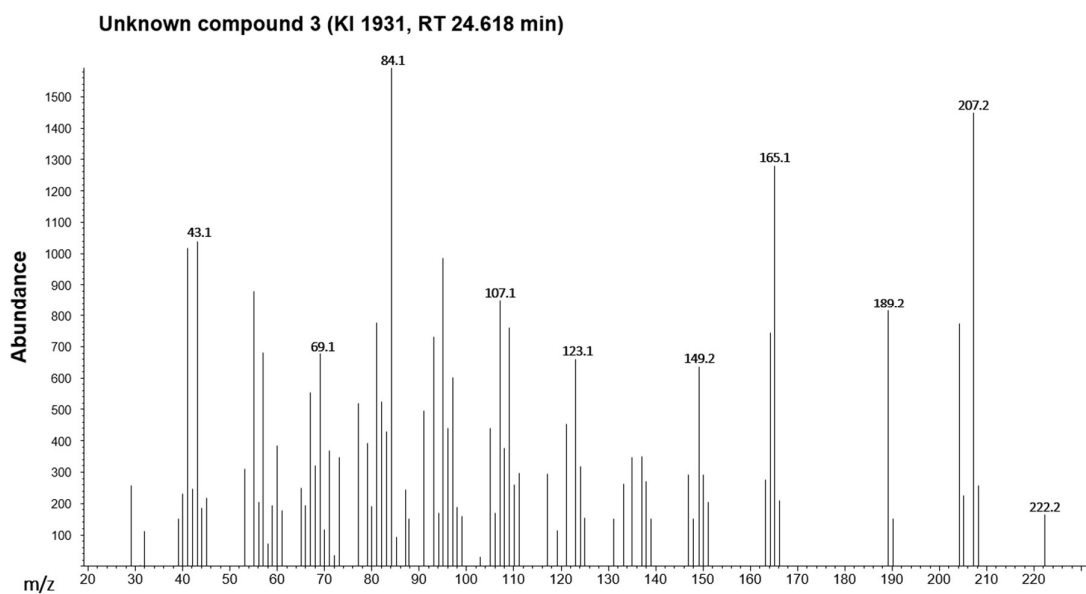

**Supplementary figure 15. Mass spectrum of "Unknown compound 3", the second of two GC-EAD compounds with unknown structure and identity.**

**Supplementary figure 16**

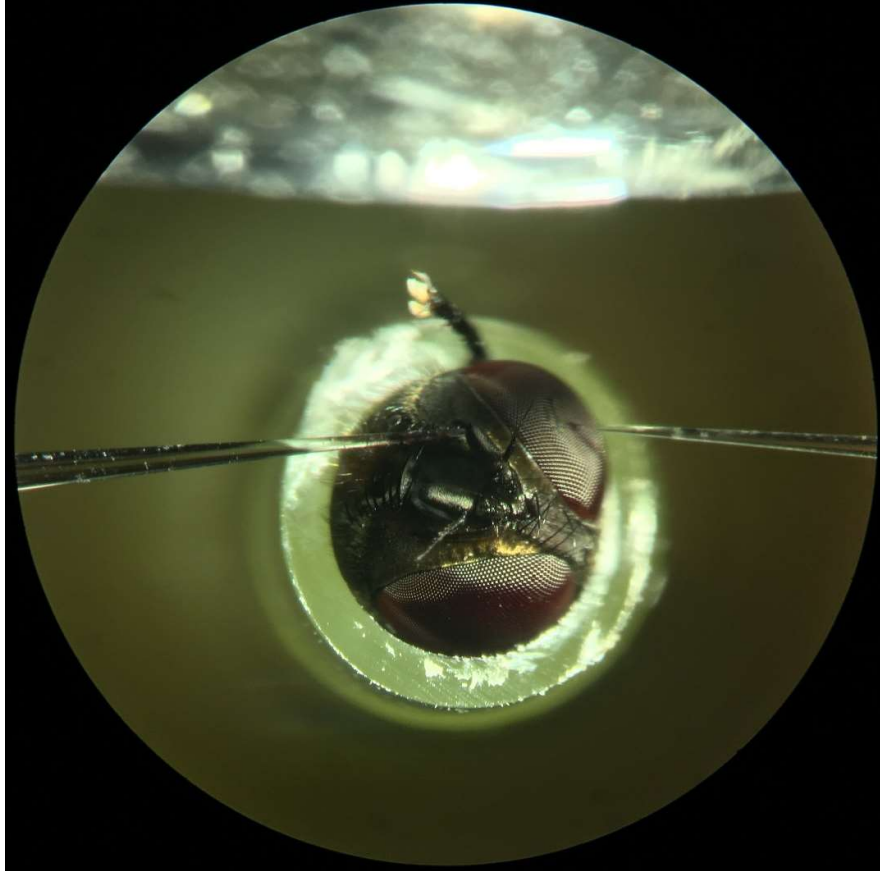

**Supplementary figure 16. GC-EAD setup.** A living, male housefly was fixed in a cut-off pipette tip so that only the head protruded. Electrodes in glass capillaries filled with Ringer solution were placed in the eye (ground electrode) and on the tip of the funiculus (recording electrode) on the living fly. The top, white glass surface is the glass tube that delivered purified and humidified air stream with compounds eluting from the GC column.

## Supplementary figure 17

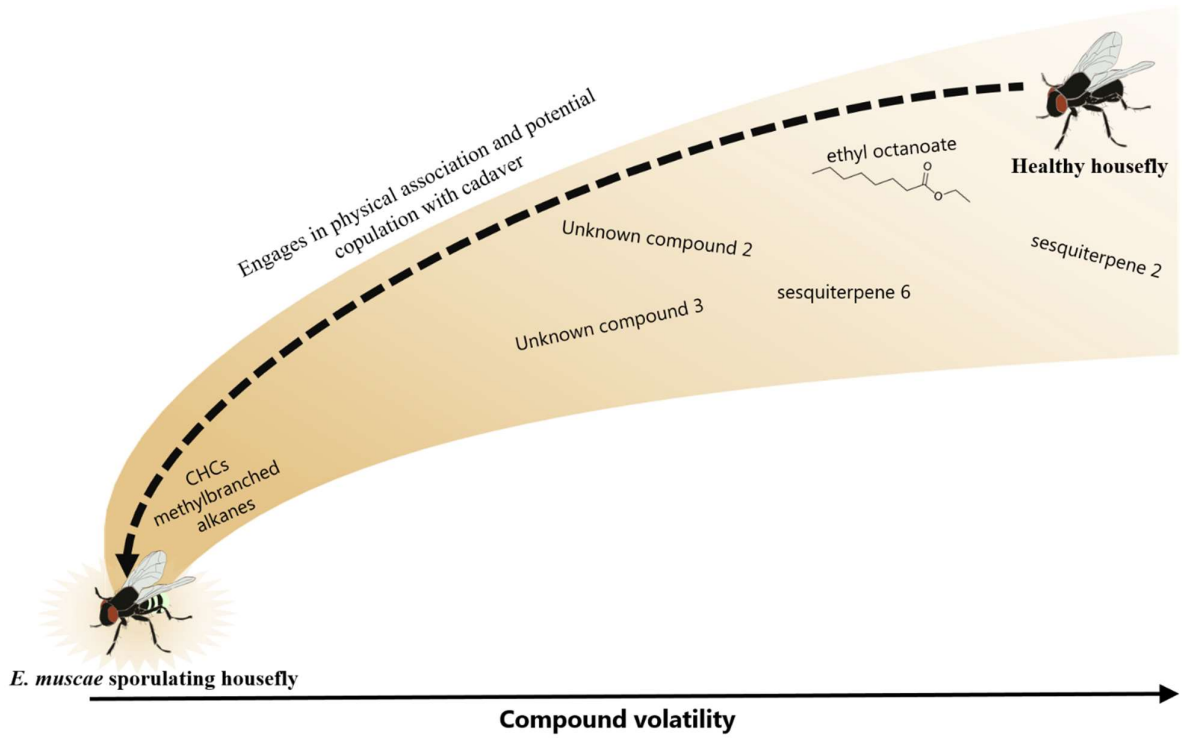

**Supplementary figure 17. Conceptual model of housefly attraction to *E. muscae* sporulating cadavers.** A healthy housefly male encounters a plume of highly volatile attractants. The male follows this increasing gradient of chemical cues until in vicinity of a sporulating female cadaver (dashed arrow). Here, the changes in the CHC profile and the methylbranched alkanes in particular, stimulate male mating behavior and cause him to engage in copulation with the cadaver.



Supplementary table 1

| Tentatively identified compound                                                                                               | KI (DB-1 column) | Uninfected females (5)            | Uninfected females, late control (5) | Infected females (5)                | Infected females, late sporulation (5) | Uninfected males (5)                | Uninfected males, late control (5)  | Infected males (5)                    | Infected males, late sporulation (5)  | Conidia from females (2) | Conidia from males (5)          |
|-------------------------------------------------------------------------------------------------------------------------------|------------------|-----------------------------------|--------------------------------------|-------------------------------------|----------------------------------------|-------------------------------------|-------------------------------------|---------------------------------------|---------------------------------------|--------------------------|---------------------------------|
| 1-Undecyl acetate                                                                                                             | 1484.9           | -                                 | -                                    | -                                   | 2.49E+07 ± 2.9E+06                     | -                                   | -                                   | -                                     | 4.65E+07 ± 1.4E+07                    | 1.19E+07                 | 2.69E+07 ± 3.1E+06              |
| 1-Tetradecanol                                                                                                                | 1651.8           | -                                 | -                                    | -                                   | 8.74E+06 ± 3.3E+06                     | -                                   | -                                   | -                                     | 1.58E+07 ± 5.5E+06                    | 2.93E+07                 | 2.94E+07 ± 3.5E+06              |
| 1-Octadecanol                                                                                                                 | 2060.1           | -                                 | -                                    | -                                   | 5.75E+07 ± 1.1E+07                     | -                                   | -                                   | -                                     | 9.43E+07 ± 2.4E+07                    | 9.97E+07                 | 2.36E+08 ± 3.3E+07              |
| Heneicosane                                                                                                                   | 2094.3           | -                                 | -                                    | -                                   | -                                      | 2.90E+06 ± 4.3E+05                  | 2.87E+06 ± 6.8E+04                  | 5.58E+06 ± 9.0E+05                    | 3.90E+07 ± 2.9E+07                    | -                        | -                               |
| Tetradecyl hexanoate                                                                                                          | 2160.7           | -                                 | -                                    | 1.88E+08 ± 4.3E+07                  | 1.78E+08 ± 4.8E+07                     | -                                   | -                                   | 1.01E+08 ± 2.2E+07                    | 2.09E+08 ± 5.2E+07                    | -                        | -                               |
| Octadecyl isocyanate                                                                                                          | 2171.6           | -                                 | -                                    | -                                   | -                                      | -                                   | -                                   | -                                     | -                                     | 3.38E+08                 | 1.96E+08 ± 3.7E+07              |
| 1-Octadecyl acetate                                                                                                           | 2184.0           | -                                 | -                                    | 1.92E+08 ± 4.2E+07                  | 2.34E+08 ± 4.7E+07                     | -                                   | -                                   | 1.16E+08 ± 1.0E+07                    | 4.37E+08 ± 4.5E+07                    | 4.66E+07                 | 1.24E+08 ± 7.7E+06              |
| Tricosene                                                                                                                     | 2268.6           | -                                 | -                                    | -                                   | 1.82E+07 ± 2.2E+06                     | -                                   | -                                   | -                                     | 2.93E+07 ± 6.9E+06                    | -                        | -                               |
| Tricosane                                                                                                                     | 2301.1           | 4.91E+06 ± 1.0E+06                | 3.32E+06 ± 2.6E+05                   | 1.21E+07 ± 2.6E+06                  | 1.53E+07 ± 2.4E+06                     | 2.48E+08 ± 2.3E+07                  | 3.65E+08 ± 2.0E+07                  | 2.90E+08 ± 3.1E+07                    | 3.37E+08 ± 2.9E+07                    | -                        | -                               |
| Tetradecyl octanoate                                                                                                          | 2355.0           | -                                 | -                                    | 2.14E+08 ± 4.8E+07                  | 1.39E+08 ± 3.0E+07                     | -                                   | -                                   | 1.51E+08 ± 1.8E+07                    | 2.68E+08 ± 5.0E+07                    | 3.42E+07                 | 3.21E+07 ± 4.1E+06              |
| Hexadecyl hexanoate                                                                                                           | 2359.1           | -                                 | -                                    | 7.63E+07 ± 1.6E+07                  | 1.05E+08 ± 1.4E+07                     | -                                   | -                                   | 5.03E+07 ± 5.2E+06                    | 1.11E+08 ± 1.1E+07                    | 6.57E+06                 | 6.89E+06 ± 1.6E+06              |
| Octadecyl butyrate                                                                                                            | 2365.9           | -                                 | -                                    | 1.10E+08 ± 2.4E+07                  | 1.47E+08 ± 2.8E+07                     | -                                   | -                                   | 7.29E+07 ± 1.1E+07                    | 1.91E+08 ± 2.3E+07                    | 2.66E+07                 | 8.33E+07 ± 6.0E+06              |
| 1-Eicosyl acetate                                                                                                             | 2386.0           | -                                 | -                                    | 2.91E+07 ± 6.9E+06                  | 8.11E+07 ± 7.9E+06                     | -                                   | -                                   | 2.78E+07 ± 8.3E+06                    | 1.18E+08 ± 1.3E+07                    | 3.36E+07                 | 8.91E+07 ± 3.9E+06              |
| Tetracosane                                                                                                                   | 2393.6           | -                                 | -                                    | 1.74E+07 ± 3.3E+06                  | 2.62E+07 ± 6.7E+06                     | 9.19E+06 ± 7.4E+05                  | 1.32E+07 ± 4.7E+05                  | 3.84E+07 ± 1.0E+07                    | 4.14E+07 ± 7.0E+06                    | -                        | -                               |
| Pentacosene                                                                                                                   | 2477.3           | -                                 | -                                    | -                                   | -                                      | -                                   | -                                   | 6.26E+07 ± 1.8E+07                    | 5.34E+07 ± 1.5E+07                    | -                        | -                               |
| Pentacosane                                                                                                                   | 2493.4           | 7.35E+07 ± 9.4E+06                | 5.65E+07 ± 2.4E+06                   | 1.37E+08 ± 2.4E+07                  | 1.61E+08 ± 1.9E+07                     | 7.23E+08 ± 6.2E+07                  | 1.13E+09 ± 3.5E+07                  | 6.81E+08 ± 6.7E+07                    | 9.46E+08 ± 6.6E+07                    | -                        | 8.98E+06 ± 1.3E+06              |
| 9-, 11-, 13-Methylpentacosanes                                                                                                | 2531.8           | 2.77E+06 ± 4.6E+05                | 1.97E+06 ± 1.6E+05                   | -                                   | -                                      | -                                   | -                                   | -                                     | -                                     | -                        | -                               |
| Hexadecyl octanoate                                                                                                           | 2556.2           | -                                 | -                                    | 1.23E+08 ± 3.1E+07                  | 2.14E+08 ± 2.7E+07                     | -                                   | -                                   | 6.38E+07 ± 6.6E+06                    | 2.96E+08 ± 4.5E+07                    | 2.01E+07                 | 3.28E+07 ± 3.5E+06              |
| Octadecyl hexanoate                                                                                                           | 2561.7           | -                                 | -                                    | 2.79E+08 ± 6.0E+07                  | 2.75E+08 ± 4.9E+07                     | -                                   | -                                   | 2.06E+08 ± 2.2E+07                    | 2.94E+08 ± 2.4E+07                    | 7.72E+06                 | 1.53E+07 ± 2.1E+06              |
| 3-Methylpentacosane                                                                                                           | 2569.1           | 2.24E+06 ± 3.4E+05                | 1.58E+06 ± 4.1E+05                   | -                                   | -                                      | -                                   | -                                   | -                                     | -                                     | -                        | -                               |
| 9-Hexacosene <sup>A</sup> + unknown compound <sup>B</sup>                                                                     | 2570.8           | -                                 | -                                    | -                                   | -                                      | 1.11E+07 ± 1.5E+06 <sup>A</sup>     | 1.47E+07 ± 1.0E+06 <sup>A</sup>     | 8.59E+07 ± 1.4E+07 <sup>A,B</sup>     | 1.93E+08 ± 1.9E+07 <sup>A,B</sup>     | -                        | -                               |
| 5,9-Dimethylpentacosane                                                                                                       | 2580.1           | 6.58E+06 ± 1.2E+06                | 1.01E+07 ± 3.7E+06                   | -                                   | -                                      | -                                   | -                                   | -                                     | -                                     | -                        | -                               |
| 1-Docosyl acetate                                                                                                             | 2586.5           | -                                 | -                                    | 7.40E+06 ± 2.4E+06                  | 5.06E+07 ± 1.5E+07                     | -                                   | -                                   | 8.38E+06 ± 3.6E+06                    | 4.01E+07 ± 6.1E+06                    | 8.74E+06                 | 2.71E+07 ± 1.7E+06              |
| Hexacosane                                                                                                                    | 2594.9           | 8.48E+06 ± 1.1E+06                | 1.37E+07 ± 6.4E+06                   | 4.42E+07 ± 6.4E+06                  | 7.02E+07 ± 1.6E+07                     | 1.79E+07 ± 1.4E+06                  | 2.50E+07 ± 1.3E+06                  | 4.76E+07 ± 9.2E+06                    | 6.38E+07 ± 1.1E+07                    | -                        | -                               |
| 3,7- 3,9-, 3,11- and 3,13-Dimethylpentacosanes                                                                                | 2606.7           | 1.12E+07 ± 2.0E+06                | 9.95E+06 ± 1.8E+06                   | -                                   | -                                      | -                                   | -                                   | -                                     | -                                     | -                        | -                               |
| 10-, 12-, 13-Methylhexacosanes                                                                                                | 2631.8           | 7.30E+06 ± 1.2E+06                | 6.45E+06 ± 5.8E+05                   | -                                   | -                                      | -                                   | -                                   | -                                     | -                                     | -                        | -                               |
| 2-Methylhexacosane                                                                                                            | 2659.6           | 5.40E+06 ± 1.0E+06                | 2.66E+06 ± 6.6E+05                   | 1.21E+07 ± 2.3E+06                  | -                                      | -                                   | -                                   | -                                     | -                                     | -                        | -                               |
| Heptacosene                                                                                                                   | 2672.8           | 2.31E+07 ± 3.6E+06                | 3.21E+07 ± 1.2E+07                   | 4.81E+07 ± 8.3E+06                  | 9.39E+07 ± 1.9E+07                     | 1.84E+09 ± 1.9E+08                  | 2.67E+09 ± 1.5E+08                  | 2.95E+09 ± 2.3E+08                    | 3.69E+09 ± 3.0E+08                    | -                        | 3.86E+07 ± 7.0E+06              |
| Heptacosane                                                                                                                   | 2696.9           | 2.16E+08 ± 2.4E+07                | 1.75E+08 ± 1.6E+07                   | 2.75E+08 ± 4.6E+07                  | 3.20E+08 ± 1.5E+07                     | 4.82E+08 ± 5.1E+07                  | 7.69E+08 ± 4.2E+07                  | 4.56E+08 ± 4.2E+07                    | 6.47E+08 ± 4.9E+07                    | -                        | -                               |
| 9-, 11-, 13-Methylheptacosanes                                                                                                | 2729.4           | 3.73E+08 ± 3.7E+07                | 3.70E+08 ± 2.4E+07                   | 1.60E+08 ± 4.3E+07                  | 1.45E+08 ± 3.6E+07                     | 4.81E+06 ± 6.5E+05                  | 6.01E+06 ± 7.7E+05                  | 1.76E+07 ± 3.9E+06                    | -                                     | -                        | -                               |
| 7-Methylheptacosane                                                                                                           | 2740.0           | 5.30E+07 ± 6.4E+06                | 8.05E+07 ± 2.9E+07                   | 4.93E+07 ± 1.9E+07                  | 4.59E+07 ± 3.6E+06                     | 2.11E+06 ± 4.8E+05                  | 2.43E+06 ± 4.1E+05                  | 3.85E+06 ± 1.5E+06                    | -                                     | -                        | -                               |
| 5-Methylheptacosane <sup>A</sup> + Tetradecyl dodecanoate <sup>B</sup>                                                        | 2747.5           | 4.75E+07 ± 5.8E+06 <sup>A</sup>   | 5.84E+07 ± 1.1E+07 <sup>A</sup>      | 1.21E+08 ± 2.3E+07 <sup>A,B</sup>   | 1.86E+08 ± 1.5E+07 <sup>A,B</sup>      | -                                   | -                                   | 7.97E+07 ± 8.1E+06 <sup>A,B</sup>     | 2.57E+08 ± 3.9E+07 <sup>A,B</sup>     | 7.55E+07 <sup>B</sup>    | 4.80E+07 ± 6.6E+06 <sup>B</sup> |
| Octadecyl octanoate                                                                                                           | 2757.3           | -                                 | -                                    | 2.39E+08 ± 4.7E+07                  | 4.91E+08 ± 6.0E+07                     | -                                   | -                                   | 1.42E+08 ± 1.4E+07                    | 6.21E+08 ± 6.8E+07                    | 4.75E+07                 | 1.02E+08 ± 1.4E+07              |
| 9,13-, 11,15-Dimethylheptacosanes                                                                                             | 2761.0           | 1.42E+08 ± 1.6E+07                | 1.49E+08 ± 2.1E+07                   | -                                   | -                                      | -                                   | -                                   | -                                     | -                                     | -                        | -                               |
| 2-Methylheptacosane                                                                                                           | 2761.1           | -                                 | -                                    | -                                   | -                                      | 6.80E+06 ± 7.7E+05                  | 8.91E+06 ± 1.0E+06                  | -                                     | -                                     | -                        | -                               |
| 3-Methylheptacosane <sup>A</sup> + 7,11-Dimethylheptacosane <sup>B</sup> + C28:1 <sup>C</sup> + unknown compound <sup>D</sup> | 2771.0           | 1.52E+08 ± 1.7E+07 <sup>A,B</sup> | 1.53E+08 ± 1.7E+07 <sup>A,B</sup>    | 8.20E+07 ± 1.4E+07 <sup>A,B,D</sup> | 1.50E+08 ± 1.1E+07 <sup>A,B,D</sup>    | 2.31E+07 ± 3.1E+06 <sup>A,B,D</sup> | 3.18E+07 ± 2.7E+06 <sup>A,B,C</sup> | 8.20E+07 ± 1.1E+07 <sup>A,B,C,D</sup> | 1.41E+08 ± 1.4E+07 <sup>A,B,C,D</sup> | -                        | -                               |
| 5,9-Dimethylheptacosane                                                                                                       | 2779.5           | 7.30E+07 ± 8.1E+06                | 7.79E+07 ± 1.4E+07                   | 1.88E+07 ± 4.8E+06                  | 4.85E+07 ± 1.5E+07                     | -                                   | -                                   | -                                     | -                                     | -                        | -                               |
| Octacosane                                                                                                                    | 2794.7           | 2.94E+07 ± 4.0E+06                | 4.14E+07 ± 1.4E+07                   | 4.01E+07 ± 6.1E+06                  | 8.18E+07 ± 2.2E+07                     | 3.91E+06 ± 4.6E+05                  | 5.83E+06 ± 4.8E+05                  | 2.36E+07 ± 3.7E+06                    | 5.02E+07 ± 1.7E+07                    | -                        | -                               |
| 3,7-, 3,9-, 3,11-Dimethylheptacosanes                                                                                         | 2805.9           | 1.09E+08 ± 1.2E+07                | 1.21E+08 ± 2.0E+07                   | 2.26E+07 ± 6.2E+06                  | 6.36E+07 ± 1.8E+07                     | -                                   | -                                   | -                                     | -                                     | -                        | -                               |

|                                                                                                                                 |        |                                       |                                       |                                         |                                        |                                       |                                       |                                         |                                        |                           |                                        |
|---------------------------------------------------------------------------------------------------------------------------------|--------|---------------------------------------|---------------------------------------|-----------------------------------------|----------------------------------------|---------------------------------------|---------------------------------------|-----------------------------------------|----------------------------------------|---------------------------|----------------------------------------|
| Squalene                                                                                                                        | 2814.9 | -                                     | -                                     | 5.35E+06<br>± 1.1E+06                   | 3.40E+07 ±<br>1.2E+07                  | -                                     | -                                     | 4.51E+06<br>± 1.2E+06                   | 1.76E+07 ±<br>3.6E+06                  | 7.16E+06                  | 8.79E+06 ±<br>1.2E+06                  |
| 12-, 13-, 14-<br>Methyloctacosanes                                                                                              | 2827.5 | 6.98E+07<br>± 6.6E+06                 | 7.05E+07<br>± 1.2E+07                 | 2.36E+07<br>± 4.9E+06                   | 5.55E+07 ±<br>2.0E+07                  | -                                     | -                                     | -                                       | -                                      | -                         | -                                      |
| 4-, 6-, 8-, 10-<br>Methyloctacosanes                                                                                            | 2835.9 | 6.14E+07<br>± 7.2E+06                 | 7.71E+07<br>± 1.8E+07                 | 1.23E+07<br>± 2.4E+06                   | 4.09E+07 ±<br>1.7E+07                  | -                                     | -                                     | -                                       | -                                      | -                         | -                                      |
| 2-Methyloctacosane                                                                                                              | 2859.5 | 5.36E+07<br>± 6.3E+06                 | 5.60E+07<br>± 1.9E+07                 | 4.32E+07<br>± 6.8E+06                   | 8.22E+07 ±<br>1.6E+07                  | -                                     | -                                     | -                                       | -                                      | -                         | -                                      |
| Nonacosene                                                                                                                      | 2872.6 | 4.87E+07<br>± 6.3E+06                 | 4.92E+07<br>± 8.9E+06                 | 7.91E+07<br>± 1.9E+07                   | 1.30E+08 ±<br>1.6E+07                  | 3.56E+08<br>± 4.2E+07                 | 5.60E+08<br>± 4.7E+07                 | 5.54E+08<br>± 3.5E+07                   | 7.88E+08 ±<br>7.9E+07                  | -                         | -                                      |
| Nonacosane                                                                                                                      | 2894.6 | 3.07E+08<br>± 4.1E+07                 | 2.59E+08<br>± 1.4E+07                 | 2.01E+08<br>± 4.2E+07                   | 2.80E+08 ±<br>4.1E+07                  | 2.79E+07<br>± 2.6E+06                 | 4.05E+07<br>± 2.8E+06                 | 4.84E+07<br>± 3.5E+06                   | 7.90E+07 ±<br>1.0E+07                  | -                         | -                                      |
| 9-, 11-, 13-, 15-<br>Methylnonacosane                                                                                           | 2929.4 | 6.43E+08<br>± 5.9E+07                 | 5.74E+08<br>± 3.5E+07                 | 3.87E+08<br>± 7.5E+07                   | 4.87E+08 ±<br>5.9E+07                  | -                                     | -                                     | -                                       | -                                      | -                         | -                                      |
| 7-Methylnonacosane                                                                                                              | 2936.1 | 1.84E+08<br>± 1.9E+07                 | 1.81E+08<br>± 1.3E+07                 | 1.04E+08<br>± 2.6E+07                   | 1.28E+08 ±<br>2.0E+07                  | 2.44E+06<br>± 3.2E+05                 | 2.93E+06<br>± 1.4E+05                 | 1.81E+07<br>± 1.8E+06                   | -                                      | -                         | -                                      |
| 5-Methylnonacosane                                                                                                              | 2948.3 | 4.96E+07<br>± 6.2E+06                 | 4.91E+07<br>± 5.9E+06                 | -                                       | -                                      | -                                     | -                                     | -                                       | -                                      | -                         | -                                      |
| Myristyl myristate                                                                                                              | 2951.8 | -                                     | -                                     | 4.03E+08<br>± 8.4E+07                   | 1.29E+09 ±<br>1.8E+08                  | -                                     | -                                     | 2.20E+08<br>± 2.4E+07                   | 1.99E+09 ±<br>3.2E+08                  | 2.46E+09                  | 1.78E+09 ±<br>2.5E+08                  |
| 2-Methylnonacosane <sup>A</sup><br>+ unknown compound <sup>B</sup>                                                              | 2959.8 | 1.91E+08<br>±<br>2.1E+07 <sup>A</sup> | 1.79E+08<br>±<br>1.7E+07 <sup>A</sup> | 1.95E+08<br>±<br>2.9E+07 <sup>A,B</sup> | 2.97E+08 ±<br>3.1E+07 <sup>A,B</sup>   | -                                     | -                                     | -                                       | -                                      | -                         | -                                      |
| 3-Methylnonacosane                                                                                                              | 2971.8 | 2.88E+08<br>± 3.3E+07                 | 2.78E+08<br>± 2.1E+07                 | 1.44E+08<br>± 3.4E+07                   | 1.99E+08 ±<br>3.1E+07                  | 1.55E+07<br>± 1.6E+06                 | 1.99E+07<br>± 2.4E+06                 | 8.37E+07<br>± 1.8E+07                   | 1.35E+08 ±<br>5.2E+07                  | -                         | -                                      |
| Triacosane                                                                                                                      | 2994.8 | 2.46E+07<br>± 3.7E+06                 | 2.56E+07<br>± 6.0E+06                 | 2.93E+07<br>± 4.8E+06                   | 5.63E+07 ±<br>1.1E+07                  | -                                     | -                                     | 8.22E+06<br>± 7.1E+05                   | 2.28E+07 ±<br>4.1E+06                  | -                         | -                                      |
| 3,7-, 3,9-, 3,11-,<br>3,13-<br>Dimethyltriacosanes                                                                              | 3003.2 | 1.53E+08<br>± 1.6E+07                 | 1.50E+08<br>± 1.8E+07                 | 5.82E+07<br>± 1.4E+07                   | 1.19E+08 ±<br>2.0E+07                  | -                                     | -                                     | -                                       | -                                      | -                         | -                                      |
| 10-, 12-<br>Methyltriacosanes                                                                                                   | 3027.8 | 3.13E+07<br>± 4.6E+06                 | 3.00E+07<br>± 7.7E+06                 | 4.74E+07<br>± 1.1E+07                   | 6.25E+07 ±<br>4.4E+06                  | -                                     | -                                     | -                                       | -                                      | -                         | -                                      |
| 8-Methyltriacosane                                                                                                              | 3034.2 | 3.97E+07<br>± 4.7E+06                 | 4.41E+07<br>± 9.3E+06                 | 2.99E+07<br>± 7.1E+06                   | 2.38E+07 ±<br>4.9E+06                  | -                                     | -                                     | -                                       | -                                      | -                         | -                                      |
| 2-, 4-methyltriacosanes                                                                                                         | 3059.5 | 4.92E+07<br>± 6.3E+06                 | 5.20E+07<br>± 1.2E+07                 | 5.76E+07<br>± 9.2E+06                   | 7.62E+07 ±<br>7.9E+06                  | 1.05E+07<br>± 1.4E+06                 | 1.31E+07<br>± 1.9E+06                 | 1.56E+07<br>± 1.4E+06                   | 3.12E+07 ±<br>4.5E+06                  | -                         | -                                      |
| Henitriacosene                                                                                                                  | 3074.1 | 2.72E+08<br>± 3.3E+07                 | 2.69E+08<br>± 2.4E+07                 | 4.91E+08<br>± 1.0E+08                   | 6.20E+08 ±<br>9.4E+07                  | 8.01E+06<br>± 9.8E+05                 | 1.03E+07<br>± 1.0E+06                 | 1.85E+07<br>± 2.4E+06                   | 4.09E+07 ±<br>7.7E+06                  | -                         | -                                      |
| Henitriacosane                                                                                                                  | 3096.4 | 1.19E+08<br>± 1.8E+07                 | 1.03E+08<br>± 6.6E+06                 | 1.67E+08<br>± 4.0E+07                   | 2.08E+08 ±<br>1.2E+07                  | 1.87E+07<br>± 1.7E+06                 | 2.46E+07<br>± 1.1E+06                 | 2.13E+07<br>± 2.1E+06                   | 5.52E+07 ±<br>9.8E+06                  | -                         | -                                      |
| 9-, 11-, 13-, 15-<br>Methylhentriacosanes <sup>A</sup><br>+ unknown compound <sup>B</sup>                                       | 3129.9 | 2.37E+08<br>±<br>2.9E+07 <sup>A</sup> | 3.05E+08<br>±<br>3.5E+07 <sup>A</sup> | 7.93E+08<br>±<br>1.1E+08 <sup>A,B</sup> | 1.12E+09 ±<br>1.4E+08 <sup>A,B</sup>   | 2.05E+07<br>±<br>2.4E+06 <sup>A</sup> | 2.68E+07<br>±<br>2.5E+06 <sup>A</sup> | 2.29E+08<br>±<br>2.0E+07 <sup>A,B</sup> | -                                      | -                         | -                                      |
| 7-Methylhentriacosane                                                                                                           | 3137.7 | 2.91E+07<br>± 3.6E+06                 | 1.08E+07<br>± 4.0E+06                 | 6.46E+07<br>± 1.4E+07                   | -                                      | 2.81E+06<br>± 2.0E+05                 | 3.60E+06<br>± 4.6E+05                 | -                                       | -                                      | -                         | -                                      |
| 5-Methylhentriacosane                                                                                                           | 3149.7 | 1.79E+07<br>± 3.2E+06                 | 6.33E+06<br>± 2.3E+06                 | -                                       | -                                      | 3.67E+06<br>± 3.1E+05                 | 3.63E+06<br>± 3.9E+05                 | -                                       | -                                      | -                         | -                                      |
| 2-<br>Methylhentriacosane <sup>A</sup><br>+ Octadecyl<br>dodecanoate <sup>B</sup><br>+ Hexadecyl<br>tetradecanoate <sup>C</sup> | 3163.6 | 9.36E+07<br>±<br>1.2E+07 <sup>A</sup> | 9.81E+07<br>±<br>1.3E+07 <sup>A</sup> | 8.51E+08<br>±<br>1.8E+08 <sup>A</sup>   | 3.41E+09 ±<br>5.2E+08 <sup>A,B,C</sup> | 8.78E+06<br>±<br>9.2E+05 <sup>A</sup> | 9.71E+06<br>±<br>1.1E+06 <sup>A</sup> | 3.73E+08<br>±<br>4.0E+07 <sup>B,C</sup> | 5.08E+09 ±<br>7.1E+08 <sup>B,C</sup>   | 7.67E+09 <sup>B,C</sup>   | 1.08E+10 ±<br>9.1E+08 <sup>B,C</sup>   |
| 3-Methylhentriacosane                                                                                                           | 3172.3 | 1.85E+08<br>± 2.7E+07                 | 1.64E+08<br>± 1.1E+07                 | 2.46E+08<br>± 5.0E+07                   | 2.87E+08 ±<br>1.7E+07                  | 1.75E+07<br>± 1.8E+06                 | 2.13E+07<br>± 1.6E+06                 | 2.62E+07<br>± 2.3E+06                   | 3.55E+07 ±<br>3.1E+06                  | -                         | -                                      |
| Dotriacosane                                                                                                                    | 3200.2 | 5.25E+06<br>± 8.8E+05                 | 3.33E+07<br>± 4.2E+06                 | 1.99E+07<br>± 4.9E+06                   | 4.66E+07 ±<br>8.6E+06                  | -                                     | -                                     | -                                       | -                                      | -                         | -                                      |
| 2-Methyldotriacosane                                                                                                            | 3260.1 | 2.64E+07<br>± 6.5E+06                 | 2.21E+07<br>± 5.7E+06                 | 3.65E+07<br>± 6.0E+06                   | 5.61E+07 ±<br>7.4E+06                  | -                                     | -                                     | -                                       | -                                      | -                         | -                                      |
| Tritricosene                                                                                                                    | 3275.9 | 1.34E+08<br>± 1.9E+07                 | 1.08E+08<br>± 9.1E+06                 | 4.69E+08<br>± 1.1E+08                   | 5.74E+08 ±<br>6.3E+07                  | 1.63E+07<br>± 2.6E+06                 | 1.28E+07<br>± 1.2E+06                 | 3.21E+07<br>± 4.6E+06                   | 7.95E+07 ±<br>1.7E+07                  | -                         | -                                      |
| Tritricosane                                                                                                                    | 3296.6 | 2.14E+07<br>± 6.6E+06                 | 1.67E+07<br>± 3.6E+06                 | 5.59E+07<br>± 1.4E+07                   | 7.40E+07 ±<br>9.3E+06                  | 7.42E+06<br>± 1.0E+06                 | 4.15E+06<br>± 3.5E+05                 | 7.10E+06<br>± 1.6E+06                   | 2.70E+07 ±<br>1.3E+07                  | -                         | -                                      |
| 7-, 9-, 11-, 13- and<br>15-<br>Methyltriacosanes <sup>A</sup><br>+ unknown compound <sup>B</sup>                                | 3329.3 | 8.33E+07<br>±<br>1.8E+07 <sup>A</sup> | 5.99E+07<br>±<br>8.5E+06 <sup>A</sup> | 2.34E+08<br>±<br>4.9E+07 <sup>A,B</sup> | 4.84E+08 ±<br>4.1E+07 <sup>A,B</sup>   | 1.18E+07<br>±<br>2.3E+06 <sup>A</sup> | 1.25E+07<br>±<br>1.1E+06 <sup>A</sup> | 3.01E+07<br>±<br>4.7E+06 <sup>A,B</sup> | -                                      | -                         | -                                      |
| 11,15-, 13,17-,<br>15,19-<br>Dimethyltriacosanes                                                                                | 3356.6 | 4.21E+07<br>± 1.2E+07                 | 2.85E+07<br>± 3.4E+06                 | -                                       | -                                      | -                                     | -                                     | -                                       | -                                      | -                         | -                                      |
| 3-Methyltriacosane                                                                                                              | 3365.7 | 1.67E+07<br>± 7.6E+06                 | 8.92E+06<br>± 2.1E+06                 | 5.52E+07<br>± 2.6E+07                   | -                                      | -                                     | -                                     | -                                       | -                                      | -                         | -                                      |
| Octadecyl<br>tetradecanoate                                                                                                     | 3376.7 | -                                     | -                                     | 2.15E+08<br>± 4.6E+07                   | 2.21E+09 ±<br>3.8E+08                  | -                                     | -                                     | 9.64E+07<br>± 1.1E+07                   | 3.71E+09 ±<br>7.4E+08                  | 6.10E+09                  | 1.16E+10 ±<br>8.2E+08                  |
| Pentatriacosene                                                                                                                 | 3477.6 | -                                     | -                                     | 2.66E+07<br>± 8.5E+06                   | 6.06E+07 ±<br>9.6E+06                  | -                                     | -                                     | -                                       | -                                      | -                         | -                                      |
| 11-, 13-, 15- and<br>17-<br>Methylpentatriacosanes                                                                              | 3533.6 | 2.05E+07<br>± 3.7E+06                 | 1.37E+07<br>± 1.9E+06                 | 4.79E+07<br>± 8.3E+06                   | -                                      | -                                     | -                                     | -                                       | -                                      | -                         | -                                      |
| Tetradecyl eicosanoate <sup>A</sup><br>+ Octadecyl<br>hexadecanoate <sup>B</sup><br>+ Eicosyl<br>tetradecanoate <sup>C</sup>    | 3565.0 | -                                     | -                                     | 1.43E+08<br>±<br>3.6E+07 <sup>A</sup>   | 9.31E+08 ±<br>1.5E+08 <sup>A,B,C</sup> | -                                     | -                                     | 7.59E+07<br>±<br>4.8E+06 <sup>A</sup>   | 9.31E+08 ±<br>1.5E+08 <sup>A,B,C</sup> | 2.27E+09 <sup>A,B,C</sup> | 4.93E+09 ±<br>5.5E+08 <sup>A,B,C</sup> |
| 11-, 13-<br>Methylheptatriacosanes                                                                                              | 3728.7 | 3.65E+07<br>± 5.7E+06                 | 2.48E+07<br>± 3.0E+06                 | 8.71E+07<br>± 1.9E+07                   | 2.21E+08 ±<br>4.0E+07                  | -                                     | -                                     | 8.71E+07<br>± 1.9E+07                   | -                                      | -                         | -                                      |
| Hexadecyl eicosanoate                                                                                                           | 3767.4 | -                                     | -                                     | -                                       | 5.05E+08 ±<br>8.2E+07                  | -                                     | -                                     | -                                       | 1.05E+09 ±<br>2.4E+08                  | 1.15E+09                  | 1.81E+09 ±<br>1.6E+08                  |

**Supplementary table 1. Compound table of housefly cuticular extracts.** Full table of tentatively identified compounds in cuticular hexane extracts. First column shows compound names. Second columns shows Kovats Retention index. The relative amount of each compound in each sample type is given in peak area abundance  $\pm$  Standard error of the mean. Parenthesis after each sample type is the number of samples. A compound had to appear in all 5 samples to be included. Unidentified compounds were not included.

## Supplementary table 2

| Compound name         | Kovats RI (DB-WAX column) | Uninfected females (5) | Uninfected males (5) | Sporulating females (5) | Sporulating males (5) | Conidia from females (3) | Conidia from males (2) |
|-----------------------|---------------------------|------------------------|----------------------|-------------------------|-----------------------|--------------------------|------------------------|
| Sesquiterpene 1       | 1393                      | -                      | -                    | 8.40E+06 ± 3.0E+06      | 8.56E+06 ± 3.1E+06    | -                        | -                      |
| Sesquiterpene 2       | 1399                      | -                      | -                    | 4.99E+06 ± 2.2E+05      | 5.50E+06 ± 7.2E+05    | -                        | -                      |
| Sesquiterpene 3       | 1415                      | 3.76E+06 ± 1.5E+06     | -                    | 1.46E+08 ± 6.2E+07      | 1.67E+08 ± 5.6E+07    | 6.75E+06 ± 1.3E06        | 5.73E+06               |
| Ethyl octanoate       | 1436                      | -                      | -                    | 2.81E+07 ± 2.0E+07      | 5.76E+06 ± 2.2E+06    | -                        | -                      |
| Sesquiterpene 4       | 1472                      | -                      | -                    | 1.31E+06 ± 6.0E+05      | 1.27E+06 ± 5.5E+05    | -                        | -                      |
| Sesquiterpene 5       | 1496                      | -                      | -                    | 1.31E+07 ± 4.0E+06      | 3.56E+07 ± 1.6E+07    | -                        | -                      |
| Sesquiterpene 6       | 1549                      | -                      | -                    | 1.89E+06 ± 8.1E+05      | 2.38E+06 ± 1.1E+06    | -                        | -                      |
| Sesquiterpene 7       | 1636                      | -                      | -                    | 4.44E+06 ± 1.7E+06      | 2.97E+06 ± 1.2E+06    | -                        | -                      |
| Sesquiterpene 8       | 1673                      | -                      | -                    | 3.55E+05 ± 5.0E+04      | 3.95E+05 ± 5.5E+04    | -                        | -                      |
| Unknown compound 1    | 1758                      | -                      | -                    | 5.04E+06 ± 3.4E+06      | 4.68E+06 ± 2.8E+06    | -                        | -                      |
| Unknown compound 2    | 1873                      | -                      | -                    | 1.44E+07 ± 6.9E+06      | 1.52E+07 ± 6.4E+06    | -                        | -                      |
| Unknown               | 1886                      | -                      | -                    | 1.79E+07 ± 4.0E+06      | 5.19E+07 ± 1.9E+07    | -                        | -                      |
| 1-Phenylethyl alcohol | 1922                      | -                      | 5.17E+06 ± 3.1E+06   | -                       | -                     | -                        | -                      |
| Unknown compound 3    | 1931                      | -                      | -                    | 4.73E+05 ± 7.0E+04      | 3.72E+06 ± 2.0E+06    | -                        | -                      |
| Unknown compound 4    | 1980                      | -                      | -                    | 5.38E+06 ± 2.6E+06      | 1.26E+06 ± 2.5E+05    | -                        | -                      |
| Unknown compound 5    | 1984                      | -                      | -                    | 1.85E+07 ± 9.5E+06      | 2.01E+07 ± 9.1E+06    | -                        | -                      |
| Unknown compound 6    | 2033                      | -                      | -                    | 2.55E+06 ± 1.4E+06      | 5.39E+05 ± 1.0E+05    | -                        | -                      |
| Unknown compound 7    | 2039                      | -                      | -                    | 6.69E+06 ± 3.0E+06      | 6.82E+06 ± 2.6E+06    | -                        | -                      |
| Unknown compound 8    | 2050                      | -                      | -                    | 8.79E+05 ± 3.2E+05      | 4.51E+05 ± 1.3E+05    | -                        | -                      |
| 1-Tetradecyl acetate  | 2094                      | -                      | -                    | 1.85E+07 ± 1.1E+07      | 3.68E+07 ± 1.9E+07    | 1.10E+07 ± 2.9E+06       | 1.52E+07               |
| 1-Tetradecanol        | 2168                      | 3.91E+06 ± 2.1E+06     | 2.53E+06 ± 1.3E+06   | 2.33E+07 ± 1.2E+07      | 2.49E+07 ± 1.2E+07    | 8.07E+06 ± 1.5E+06       | 1.15E+07               |
| Unknown compound 9    | 2226                      | -                      | -                    | 3.90E+05 ± 3.0E+04      | 4.25E+05 ± 6.7E+04    | -                        | -                      |
| Diterpene 1           | 2286                      | -                      | -                    | 2.75E+06 ± 7.9E+05      | 2.66E+06 ± 8.6E+05    | -                        | -                      |
| 1-Hexadecyl acetate   | 2300                      | -                      | -                    | 9.10E+06 ± 6.3E+06      | 2.26E+06 ± 1.1E+06    | -                        | -                      |
| 1-Hexadecanol         | 2376                      | -                      | -                    | 3.79E+06 ± 1.8E+06      | 4.30E+06 ± 1.7E+06    | -                        | -                      |

**Supplementary table 2. Full table of tentatively identified compounds in headspace samples.** First column shows compound names. Second column shows Kovats Retention index. The relative amount of each compound in each sample type is given in peak area (TIC) ± Standard error of the mean. Parenthesis after each sample type is the number of samples. Compounds appearing in three out of five samples in a given treatment were included.

Supplementary table 3

A

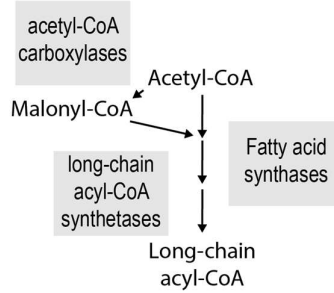

B

|                                | TranscriptID          | BLASTPtophit | %Identity | e-value   | Kegg              | EC                | log2FC | FDR_p  |
|--------------------------------|-----------------------|--------------|-----------|-----------|-------------------|-------------------|--------|--------|
| Acetyl-CoA carboxylase         | TRINITY_DN20838_c2_g2 | ACAC_SCHPO   | 39.3      | 8.14e-95  | K11262            | 6.4.1.2, 6.3.4.14 | 2.46   | 0.0000 |
|                                | TRINITY_DN9224_c0_g1  | ACAC_SCHPO   | 66.7      | 6.98e-19  | K11262            | 6.4.1.2, 6.3.4.14 | 4.19   | 0.0000 |
|                                | TRINITY_DN11999_c0_g1 | ACAC_SCHPO   | 37.7      | 2.04e-61  | K11262            | 6.4.1.2, 6.3.4.14 | 2.66   | 0.0000 |
|                                | TRINITY_DN8745_c0_g1  | ACAC_YEAST   | 70.3      | 1.59e-117 | K11262            | 6.4.1.2, 6.3.4.14 | 3.46   | 0.0001 |
|                                | TRINITY_DN1774_c0_g1  | ACAC_YEAST   | 44.0      | 5.42e-49  | K11262            | 6.4.1.2, 6.3.4.14 | 2.56   | 0.0002 |
|                                | TRINITY_DN6921_c0_g1  | ACAC_SCHPO   | 62.7      | 2.77e-41  | K11262            | 6.4.1.2, 6.3.4.14 | 4.06   | 0.0010 |
|                                | TRINITY_DN5496_c0_g1  | ACAC_YEAST   | 54.6      | 3.58e-62  | K11262            | 6.4.1.2, 6.3.4.14 | 3.76   | 0.0024 |
|                                | TRINITY_DN10159_c0_g1 | ACAC_SCHPO   | 58.6      | 3.63e-49  | K11262            | 6.4.1.2, 6.3.4.14 | 1.38   | 0.0035 |
|                                | TRINITY_DN20838_c1_g1 | ACAC_SCHPO   | 31.7      | 2.92e-15  | K11262            | 6.4.1.2, 6.3.4.14 | -0.76  | 0.0047 |
|                                | TRINITY_DN21736_c0_g1 | ACAC_SCHPO   | 62.1      | 3.35e-70  | K11262            | 6.4.1.2, 6.3.4.14 | 1.69   | 0.0059 |
|                                | TRINITY_DN1062_c0_g1  | ACAC_SCHPO   | 53.3      | 4.62e-40  | K11262            | 6.4.1.2, 6.3.4.14 | 1.50   | 0.0174 |
|                                | TRINITY_DN21389_c0_g1 | ACAC_SCHPO   | 24.1      | 2.56e-22  | K11262            | 6.4.1.2, 6.3.4.14 | 0.47   | 0.0195 |
|                                | TRINITY_DN20838_c2_g1 | ACAC_SCHPO   | 50.6      | 0         | K11262            | 6.4.1.2, 6.3.4.14 | 0.39   | 0.0568 |
|                                | TRINITY_DN2573_c0_g1  | ACAC_SCHPO   | 61.3      | 5.9e-28   | K11262            | 6.4.1.2, 6.3.4.14 | 1.78   | 0.0591 |
|                                | TRINITY_DN2535_c0_g1  | ACAC_YEAST   | 79.2      | 6.31e-64  | K11262            | 6.4.1.2, 6.3.4.14 | 2.31   | 0.0741 |
| TRINITY_DN5348_c0_g1           | ACAC_YEAST            | 75.4         | 5.07e-66  | K11262    | 6.4.1.2, 6.3.4.14 | 2.37              | 0.0925 |        |
| Fatty acid synthases FAS1/FAS2 | TRINITY_DN21615_c2_g1 | FAS2_PENPA   | 54.4      | 0         | K00667            | 2.3.1.86          | 2.45   | 0.0000 |
|                                | TRINITY_DN20289_c0_g1 | FAS2_EMEND   | 52.5      | 0         | K00667            | 2.3.1.86          | 3.43   | 0.0000 |
|                                | TRINITY_DN21615_c2_g3 | FAS2_YEAST   | 65.3      | 6.1e-36   | K00667            | 2.3.1.86          | 3.13   | 0.0000 |
|                                | TRINITY_DN16765_c0_g1 | FAS2_EMEND   | 64.4      | 1.62e-133 | K00667            | 2.3.1.86          | 2.25   | 0.0000 |
|                                | TRINITY_DN21615_c0_g1 | FAS2_LACKL   | 53.6      | 2.14e-35  | K00667            | 2.3.1.86          | 3.07   | 0.0014 |
|                                | TRINITY_DN7801_c0_g1  | FAS2_CANAX   | 81.0      | 1.63e-39  | K00667            | 2.3.1.86          | 1.59   | 0.0017 |
|                                | TRINITY_DN1128_c0_g1  | FAS2_PENPA   | 76.1      | 2.49e-32  | K00667            | 2.3.1.86          | 3.30   | 0.0154 |
|                                | TRINITY_DN2844_c0_g1  | FAS2_SCHPO   | 69.6      | 9.34e-32  | K00667            | 2.3.1.86          | 2.24   | 0.1581 |
|                                | TRINITY_DN21615_c2_g4 | FAS1_SCHPO   | 49.4      | 0         | K00668            | 2.3.1.86          | 3.33   | 0.0000 |
|                                | TRINITY_DN17570_c0_g1 | FAS1_SCHPO   | 58.1      | 9.62e-149 | K00668            | 2.3.1.86          | 3.99   | 0.0000 |
|                                | TRINITY_DN12197_c0_g1 | FAS1_YEAST   | 49.3      | 4.23e-83  | K00668            | 2.3.1.86          | 3.75   | 0.0000 |
|                                | TRINITY_DN17406_c0_g1 | FAS1_SCHPO   | 51.5      | 4.78e-115 | K00668            | 2.3.1.86          | 4.82   | 0.0000 |
|                                | TRINITY_DN15402_c0_g1 | FAS1_YARLI   | 39.8      | 1.57e-61  | K00668            | 2.3.1.86          | 4.65   | 0.0000 |
|                                | TRINITY_DN14812_c0_g1 | FAS1_CANAX   | 36.2      | 1.26e-37  | K00668            | 2.3.1.86          | 3.98   | 0.0002 |
|                                | TRINITY_DN3608_c0_g1  | FAS1_YEAST   | 50.7      | 3.45e-20  | K00668            | 2.3.1.86          | 2.57   | 0.0831 |
| TRINITY_DN5417_c0_g1           | FAS1_SCHPO            | 63.6         | 4.8e-37   | K00668    | 2.3.1.86          | 2.93              | 0.1534 |        |
| long-chain acyl-CoA synthetase | TRINITY_DN17778_c0_g2 | LCF2_YEAST   | 31.1      | 3.06e-49  | K01897            | 6.2.1.3           | 1.49   | 0.0000 |
|                                | TRINITY_DN25342_c0_g1 | LCF2_SCHPO   | 34.8      | 1.13e-136 | K01897            | 6.2.1.3           | 1.70   | 0.0000 |
|                                | TRINITY_DN19153_c0_g2 | LCF2_SCHPO   | 38.3      | 4.99e-164 | K01897            | 6.2.1.3           | 0.87   | 0.0000 |
|                                | TRINITY_DN17671_c0_g1 | LCF2_YEAST   | 25.7      | 1.99e-43  | K01897            | 6.2.1.3           | 0.54   | 0.0000 |
|                                | TRINITY_DN17778_c0_g1 | LCF2_YEAST   | 35.6      | 2.46e-39  | K01897            | 6.2.1.3           | -0.50  | 0.0002 |
|                                | TRINITY_DN19147_c0_g1 | LCF2_YEAST   | 35.6      | 3.89e-110 | K01897            | 6.2.1.3           | -0.28  | 0.0004 |
|                                | TRINITY_DN20446_c3_g2 | LCF2_SCHPO   | 33.3      | 1.76e-121 | K01897            | 6.2.1.3           | 4.30   | 0.0008 |
|                                | TRINITY_DN21065_c0_g2 | LCF2_YEAST   | 31.4      | 3.05e-95  | K01897            | 6.2.1.3           | 0.61   | 0.0047 |
|                                | TRINITY_DN20446_c3_g1 | LCF1_YEAST   | 37.1      | 6.00e-106 | K01897            | 6.2.1.3           | 4.21   | 0.2630 |
|                                | TRINITY_DN19131_c0_g1 | LCF2_YEAST   | 33.4      | 5.81e-88  | K01897            | 6.2.1.3           | -0.12  | 0.5653 |

Supplementary table 3. Fatty acid gene expression in *E. muscae*. **A.** Schematic drawing of the general fatty acid synthesis pathway in fungi. **B.** Expressed *E. muscae* transcripts annotated as either Acetyl-CoA carboxylase, Fatty acid synthases, or long-chain acyl-CoA synthetase enzymes. Fungal transcripts written in bold are significantly higher expressed in late-stage sporulating cadavers vs. early-stage sporulating cadavers.

**Supplementary table 4**

**A**

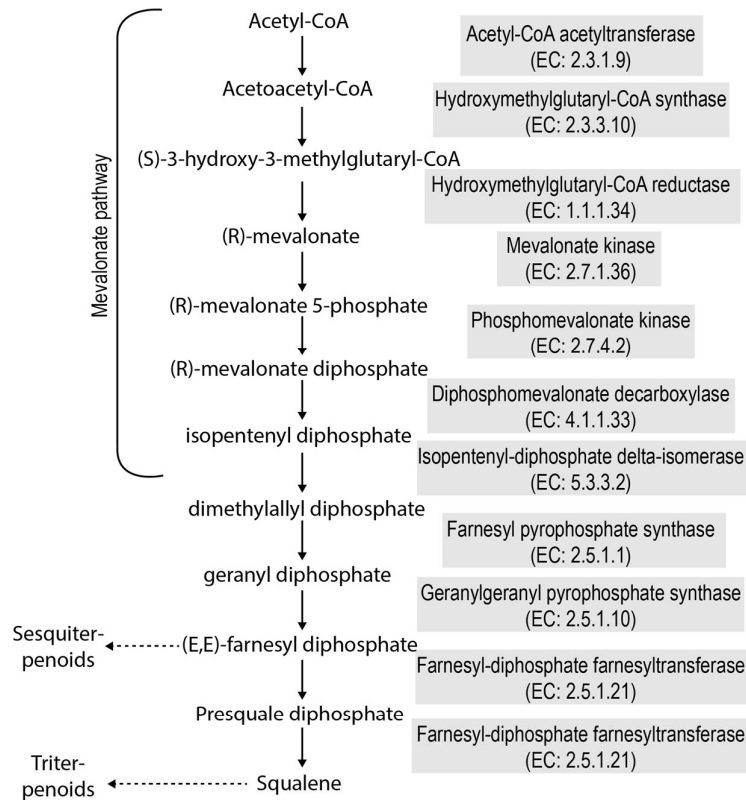

**B**

| TranscriptID          | BLASTPtophit | %identity | e-value   | Name                                                                                            | Kegg   | EC                          | log2FC | FDR_p  |
|-----------------------|--------------|-----------|-----------|-------------------------------------------------------------------------------------------------|--------|-----------------------------|--------|--------|
| TRINITY_DN14635_c0_g1 | THIL_SCHPO   | 61.3      | 6.31e-82  | Acetyl-CoA acetyltransferase                                                                    | K00626 | 2.3.1.9                     | 0.86   | 0.0031 |
| TRINITY_DN2357_c0_g2  | THIL_YARLI   | 52.1      | 4.89e-123 | Acetyl-CoA acetyltransferase                                                                    | K00626 | 2.3.1.9                     | -0.10  | 0.6482 |
| TRINITY_DN18770_c0_g1 | THIL_YARLI   | 40.7      | 1.47e-73  | Acetyl-CoA acetyltransferase                                                                    | K00626 | 2.3.1.9                     | -0.37  | 0.0500 |
| TRINITY_DN14635_c0_g2 | THIA_CANTR   | 55.5      | 3.63e-67  | Acetyl-CoA acetyltransferase                                                                    | K00626 | 2.3.1.9                     | -0.62  | 0.0312 |
| TRINITY_DN2357_c0_g1  | THIL_YARLI   | 50.6      | 1.08e-119 | Acetyl-CoA acetyltransferase                                                                    | K00626 | 2.3.1.9                     | -1.63  | 0.0000 |
| TRINITY_DN17308_c1_g1 | HMCS_YEAST   | 51.4      | 4.33e-154 | Hydroxymethylglutaryl-CoA synthase                                                              | K01641 | 2.3.3.10                    | 0.41   | 0.0000 |
| TRINITY_DN20557_c0_g1 | HMDH2_YEAST  | 44.1      | 0         | 3-hydroxy-3-methylglutaryl-coenzyme A reductase 2 (hydroxymethylglutaryl-CoA reductase (NADPH)) | K00021 | 1.1.1.34                    | 0.50   | 0.0001 |
| TRINITY_DN18020_c0_g1 | KIME_SCHPO   | 33.2      | 2.17e-36  | Putative mevalonate kinase                                                                      | K00869 | 2.7.1.36                    | -0.50  | 0.0004 |
| TRINITY_DN15321_c0_g1 | ERG8_SCHPO   | 33.2      | 1.96e-50  | Probable phosphomevalonate kinase                                                               | K00938 | 2.7.4.2                     | 0.57   | 0.0000 |
| TRINITY_DN27786_c0_g1 | MVD_GANLU    | 56.8      | 9.41e-139 | Diphosphomevalonate decarboxylase                                                               | K01597 | 4.1.1.33                    | -0.04  | 0.7858 |
| TRINITY_DN17598_c0_g1 | IDI1_SCHPO   | 58.7      | 7.94e-87  | Isopentenyl-diphosphate Delta-isomerase                                                         | K01823 | 5.3.3.2                     | 0.02   | 0.9016 |
| TRINITY_DN16421_c0_g1 | FPPS_KLULA   | 55.5      | 1.78e-140 | Farnesyl pyrophosphate synthase                                                                 | K00787 | 2.5.1.1, 2.5.1.10           | 0.24   | 0.0926 |
| TRINITY_DN18257_c1_g1 | GGPPS_MUCCL  | 52.7      | 7.51e-108 | Geranylgeranyl pyrophosphate synthase                                                           | K00804 | 2.5.1.1, 2.5.1.10, 2.5.1.29 | 0.16   | 0.1063 |
| TRINITY_DN14336_c0_g1 | GGPPS_MUCCL  | 64.2      | 5.27e-42  | Geranylgeranyl pyrophosphate synthase                                                           | K00804 | 2.5.1.1, 2.5.1.10, 2.5.1.29 | 0.01   | 0.9633 |
| TRINITY_DN16883_c0_g1 | FDFT_SCHPO   | 52.1      | 5.65e-123 | Farnesyl-diphosphate farnesyltransferase                                                        | K00801 | 2.5.1.21                    | -0.46  | 0.6100 |

**Supplementary table 4. Mevalonate and terpenoid synthesis gene expression in *E. muscae*.** **A.** Schematic drawing of the general terpenoid synthesis pathway in fungi. **B.** Expressed *E. muscae* transcripts annotated as enzymes in the general terpenoid synthesis pathway in fungi. Annotation, blastp results, and expression in late stage sporulating cadavers vs. early stage cadavers are given.

## Supplementary table 5

A

| TranscriptID                | BLASTPtophit      | Query/Hit_coverage         | %Identity     | e-value         | Name                     | Kegg          | EC       | log2FC      | FDR_p         |
|-----------------------------|-------------------|----------------------------|---------------|-----------------|--------------------------|---------------|----------|-------------|---------------|
| TRINITY_DN19029_c0_g1       | PANB_EMENI        | Q:736-1566,H:62-340        | 51.613        | 3.02e-84        | 3-methyl-2-oxobutanoate  | K00606        | 2.1.2.11 | -0.38       | 0.0617        |
| <b>TRINITY_DN8643_c0_g1</b> | <b>YM60_YEAST</b> | <b>Q:925-362,H:207-397</b> | <b>27.586</b> | <b>1.36e-16</b> | <b>Putative esterase</b> | <b>K07019</b> | -        | <b>2.96</b> | <b>0.0000</b> |
| TRINITY_DN19826_c0_g1       | YM60_YEAST        | Q:1519-410,H:8-413         | 29.71         | 2.82e-52        | Putative esterase        | K07019        | -        | 0.42        | 0.0007        |
| TRINITY_DN18612_c0_g1       | YM60_YEAST        | Q:314-1420,H:33-413        | 29.095        | 1.32e-42        | Putative esterase        | K07019        | -        | 0.21        | 0.2334        |

B

| Query = <i>S. cerevisiae</i> eeb1 (GU471249.1) |              |          |
|------------------------------------------------|--------------|----------|
| TranscriptID                                   | Score (bits) | e-value  |
| TRINITY_DN18612_c0_g1                          | 102.0        | 2.00e-38 |
| TRINITY_DN19826_c0_g1                          | 91.8         | 1.00e-33 |
| TRINITY_DN8643_c0_g1                           | 46.4         | 9.00e-12 |

| Query = <i>S. cerevisiae</i> mgl2 (YMR210W) |              |          |
|---------------------------------------------|--------------|----------|
| TranscriptID                                | Score (bits) | e-value  |
| TRINITY_DN19826_c0_g1                       | 106.0        | 3.00e-46 |
| TRINITY_DN18612_c0_g1                       | 105.0        | 3.00e-40 |
| TRINITY_DN8643_c0_g1                        | 52.4         | 2.00e-13 |

| Query = <i>S. cerevisiae</i> eht1 (AB012577.1) |              |          |
|------------------------------------------------|--------------|----------|
| TranscriptID                                   | Score (bits) | e-value  |
| TRINITY_DN19826_c0_g1                          | 96.4         | 3.00e-30 |
| TRINITY_DN18612_c0_g1                          | 97.3         | 6.00e-29 |
| TRINITY_DN19029_c0_g1                          | 88.1         | 3.00e-17 |
| TRINITY_DN8643_c0_g1                           | 49.6         | 5.00e-07 |

### Supplementary table 5. Expressed *E. muscae* transcripts with homology to ethyl ester biosynthesis genes.

A. Four *E. muscae* transcripts with homology to the yeast *Saccharomyces cerevisiae* ethyl ester biosynthesis genes eht1 and eeb1 specifically involved in ethyl octanoate biosynthesis. Results of Blastp searches and expression in late-stage sporulating cadavers vs. early-stage sporulating cadavers are shown. **A.** Results of Blastp searches with the yeast ethyl ester biosynthesis genes eht1, eeb1, and mgl2 against the *E. muscae* translated transcripts

Supplementary table 6

| Late sporulation vs. Late control                                                                               | RefSeq Acc.    | log2FC | padj        |
|-----------------------------------------------------------------------------------------------------------------|----------------|--------|-------------|
| Musca domestica cytochrome P450 4g1-like (LOC101887882), mRNA                                                   | NM_001286897.1 | -12.16 | 1.89259E-22 |
| PREDICTED: Musca domestica fatty acid synthase (LOC101893120), mRNA                                             | XM_005175727.3 | -11.28 | 3.58E-12    |
| PREDICTED: Musca domestica putative fatty acyl-CoA reductase CG8306 (LOC101894220), mRNA                        | XM_005186257.3 | -10.17 | 1.79111E-08 |
| PREDICTED: Musca domestica apolipoporphins (LOC101887937), mRNA                                                 | XM_005177378.3 | -10.13 | 5.80409E-17 |
| PREDICTED: stearoyl-CoA desaturase 5 [Musca domestica]                                                          | XM_020035426.1 | -9.27  | 6.09374E-20 |
| PREDICTED: Musca domestica putative fatty acyl-CoA reductase CG8306 (LOC101894391), mRNA                        | XM_011295377.2 | -9.11  | 2.84943E-06 |
| PREDICTED: Musca domestica putative fatty acyl-CoA reductase CG5065 (LOC101891740), mRNA                        | XM_005176936.3 | -7.91  | 8.26901E-23 |
| PREDICTED: Musca domestica putative fatty acyl-CoA reductase CG5065 (LOC101895795), transcript variant X1, mRNA | XM_005188297.3 | -7.90  | 0.00013416  |
| PREDICTED: acetyl-CoA carboxylase isoform X4 [Musca domestica]                                                  | XM_011293554.2 | -7.86  | 2.16833E-05 |
| PREDICTED: Musca domestica putative fatty acyl-CoA reductase CG5065 (LOC101895795), transcript variant X2, mRNA | XM_011296188.2 | -7.77  | 0.000253628 |
| PREDICTED: Musca domestica putative fatty acyl-CoA reductase CG5065 (LOC101895795), transcript variant X3, mRNA | XM_020038489.1 | -6.56  | 0.0269019   |
| PREDICTED: acyl-CoA Delta(11) desaturase isoform X2 [Musca domestica]                                           | XM_011295002.2 | -5.92  | 0.03097972  |
| PREDICTED: stearoyl-CoA desaturase 5 [Musca domestica]                                                          | XM_005179649.3 | -5.91  | 1.74128E-07 |
| PREDICTED: acetyl-CoA carboxylase isoform X5 [Musca domestica]                                                  | XM_020036198.1 | -5.02  | 0.156581617 |
| PREDICTED: Musca domestica fatty acyl-CoA reductase wat (LOC101900313), mRNA                                    | XM_005180061.3 | -4.39  | 0.005026714 |
| PREDICTED: acyl-CoA Delta(11) desaturase [Musca domestica]                                                      | XM_005185154.3 | -4.19  | 4.06585E-07 |
| PREDICTED: acyl-CoA Delta(11) desaturase isoform X1 [Musca domestica]                                           | XM_020037419.1 | -4.11  | 0.001316354 |
| PREDICTED: Musca domestica cytochrome P450 4g1 (LOC101887550), mRNA                                             | XM_005176292.3 | -3.86  | 0.040126949 |
| PREDICTED: Musca domestica putative fatty acyl-CoA reductase CG8306 (LOC101895407), mRNA                        | XM_005175978.3 | -3.71  | 8.97821E-05 |
| PREDICTED: Musca domestica cytochrome P450 4g1-like (LOC101888923), mRNA                                        | XM_005176300.3 | -3.57  | 0.47584952  |
| PREDICTED: acetyl-CoA carboxylase isoform X1 [Musca domestica]                                                  | XM_005181944.3 | -3.43  | 0.161531896 |
| PREDICTED: Musca domestica putative fatty acyl-CoA reductase CG5065 (LOC101900725), mRNA                        | XM_005182153.3 | -2.99  | 0.061633958 |
| PREDICTED: Musca domestica putative fatty acyl-CoA reductase CG5065 (LOC101900725), mRNA                        | XM_005182153.3 | -2.99  | 0.061633958 |
| PREDICTED: Musca domestica fatty acyl-CoA reductase wat (LOC101898308), mRNA                                    | XM_005180049.3 | -2.97  | 2.07232E-06 |
| PREDICTED: Musca domestica fatty acyl-CoA reductase wat (LOC101890000), mRNA                                    | XM_005188530.2 | -2.77  | 0.407822353 |
| PREDICTED: Musca domestica fatty acyl-CoA reductase wat (LOC101890887), mRNA                                    | XM_005183981.3 | -2.52  | 0.047549704 |
| PREDICTED: Musca domestica fatty acyl-CoA reductase wat (LOC101896175), mRNA                                    | XM_005184011.3 | -2.42  | 6.67739E-06 |
| PREDICTED: Musca domestica putative fatty acyl-CoA reductase CG5065 (LOC101889437), mRNA                        | XM_005189195.3 | -1.93  | 0.108928013 |
| PREDICTED: Musca domestica fatty acid synthase (LOC101888614), mRNA                                             | XM_020038884.1 | -1.80  | 0.000896846 |
| PREDICTED: Musca domestica putative fatty acyl-CoA reductase CG5065 (LOC101895587), transcript variant X1, mRNA | XM_005175979.3 | -1.75  | 0.210803962 |
| PREDICTED: Musca domestica fatty acyl-CoA reductase wat (LOC101889946), mRNA                                    | XM_005189198.3 | -1.40  | 0.000416809 |
| PREDICTED: Musca domestica fatty acyl-CoA reductase wat (LOC101898132), mRNA                                    | XM_005180048.3 | -1.39  | 0.014521176 |



|                                                                                                                 |                |       |             |
|-----------------------------------------------------------------------------------------------------------------|----------------|-------|-------------|
| PREDICTED: Musca domestica putative fatty acyl-CoA reductase CG8306 (LOC101900903), transcript variant X2, mRNA | XM_011293655.2 | -1.32 | 0.602050254 |
| PREDICTED: Musca domestica putative fatty acyl-CoA reductase CG8306 (LOC101889237), mRNA                        | XM_005182172.3 | -1.19 | 0.442596133 |
| PREDICTED: Musca domestica putative fatty acyl-CoA reductase CG5065 (LOC101895795), transcript variant X4, mRNA | XM_011296189.2 | -1.03 | 0.545062285 |
| PREDICTED: acetyl-CoA carboxylase isoform X3 [Musca domestica]                                                  | XM_011293553.2 | -0.96 | 0.046922987 |
| PREDICTED: Musca domestica cytochrome P450 4g1 (LOC101889105), mRNA                                             | XM_005176301.3 | -0.93 | 0.298771972 |
| PREDICTED: Musca domestica putative fatty acyl-CoA reductase CG5065 (LOC101900323), mRNA                        | XM_011293999.2 | -0.91 | 0.539496046 |
| PREDICTED: Musca domestica putative fatty acyl-CoA reductase CG8306 (LOC101892601), mRNA                        | XM_005176941.3 | -0.27 | 0.366099761 |
| PREDICTED: Musca domestica putative fatty acyl-CoA reductase CG8306 (LOC101892601), mRNA                        | XM_005176941.3 | -0.27 | 0.366099761 |
| PREDICTED: acyl-CoA Delta(11) desaturase [Musca domestica]                                                      | XM_005185155.3 | 0.12  | 0.792109614 |
| PREDICTED: acyl-CoA Delta(11) desaturase [Musca domestica]                                                      | XM_020037334.1 | 0.14  | 0.792109614 |
| PREDICTED: Musca domestica farnesyl pyrophosphate synthase (LOC101895546), mRNA                                 | XM_005182378.3 | 0.36  | 0.107435616 |
| PREDICTED: acetyl-CoA carboxylase isoform X2 [Musca domestica]                                                  | XM_020036197.1 | 0.46  | 0.556112607 |

| <b>Early sporulation vs. Early control</b>                                                                      | <b>RefSeq Acc.</b> | <b>log2FC</b> | <b>padj</b> |
|-----------------------------------------------------------------------------------------------------------------|--------------------|---------------|-------------|
| PREDICTED: Musca domestica apolipoporphins (LOC101887937), mRNA                                                 | XM_005177378.3     | -8.75         | 9.31909E-12 |
| Musca domestica cytochrome P450 4g1-like (LOC101887882), mRNA                                                   | NM_001286897.1     | -8.49         | 8.14829E-11 |
| PREDICTED: Musca domestica putative fatty acyl-CoA reductase CG8306 (LOC101894220), mRNA                        | XM_005186257.3     | -7.20         | 0.00027315  |
| PREDICTED: Musca domestica putative fatty acyl-CoA reductase CG5065 (LOC101895795), transcript variant X2, mRNA | XM_011296188.2     | -6.98         | 0.002849196 |
| PREDICTED: Musca domestica putative fatty acyl-CoA reductase CG8306 (LOC101894391), mRNA                        | XM_011295377.2     | -6.79         | 0.001633083 |
| PREDICTED: Musca domestica fatty acyl-CoA reductase wat (LOC101900313), mRNA                                    | XM_005180061.3     | -6.71         | 2.42625E-05 |
| PREDICTED: acyl-CoA Delta(11) desaturase isoform X2 [Musca domestica]                                           | XM_011295002.2     | -6.41         | 0.041009908 |
| PREDICTED: Musca domestica putative fatty acyl-CoA reductase CG5065 (LOC101891740), mRNA                        | XM_005176936.3     | -5.56         | 3.50215E-16 |
| PREDICTED: Musca domestica putative fatty acyl-CoA reductase CG8306 (LOC101895407), mRNA                        | XM_005175978.3     | -4.96         | 2.37481E-07 |
| PREDICTED: stearoyl-CoA desaturase 5 [Musca domestica]                                                          | XM_020035426.1     | -3.73         | 1.53157E-09 |
| PREDICTED: Musca domestica putative fatty acyl-CoA reductase CG8306 (LOC101900903), transcript variant X2, mRNA | XM_011293655.2     | -3.36         | 0.217299133 |
| PREDICTED: Musca domestica fatty acyl-CoA reductase wat (LOC101890000), mRNA                                    | XM_005188530.2     | -3.30         | 0.445818878 |
| PREDICTED: acetyl-CoA carboxylase isoform X5 [Musca domestica]                                                  | XM_020036198.1     | -3.23         | 0.511742809 |
| PREDICTED: stearoyl-CoA desaturase 5 [Musca domestica]                                                          | XM_005179649.3     | -3.22         | 0.006325195 |
| PREDICTED: acyl-CoA Delta(11) desaturase isoform X1 [Musca domestica]                                           | XM_020037419.1     | -3.18         | 0.015854541 |
| PREDICTED: acyl-CoA Delta(11) desaturase [Musca domestica]                                                      | XM_005185154.3     | -2.89         | 0.001904492 |
| PREDICTED: Musca domestica putative fatty acyl-CoA reductase CG8306 (LOC101889237), mRNA                        | XM_005182172.3     | -2.64         | 0.112915655 |
| PREDICTED: Musca domestica fatty acyl-CoA reductase wat (LOC101898308), mRNA                                    | XM_005180049.3     | -1.91         | 0.003587708 |
| PREDICTED: Musca domestica fatty acyl-CoA reductase wat (LOC101896175), mRNA                                    | XM_005184011.3     | -1.72         | 0.003019074 |
| PREDICTED: Musca domestica fatty acyl-CoA reductase wat (LOC101890887), mRNA                                    | XM_005183981.3     | -1.68         | 0.331271747 |

|                                                                                                                 |                |       |             |
|-----------------------------------------------------------------------------------------------------------------|----------------|-------|-------------|
| PREDICTED: Musca domestica cytochrome P450 4g1 (LOC101887550), mRNA                                             | XM_005176292.3 | -1.64 | 0.558297926 |
| PREDICTED: acetyl-CoA carboxylase isoform X4 [Musca domestica]                                                  | XM_011293554.2 | -1.41 | 0.554000921 |
| PREDICTED: acetyl-CoA carboxylase isoform X1 [Musca domestica]                                                  | XM_005181944.3 | -1.38 | 0.708316717 |
| PREDICTED: Musca domestica putative fatty acyl-CoA reductase CG5065 (LOC101900725), mRNA                        | XM_005182153.3 | -1.37 | 0.543449079 |
| PREDICTED: Musca domestica putative fatty acyl-CoA reductase CG5065 (LOC101900725), mRNA                        | XM_005182153.3 | -1.37 | 0.543449079 |
| PREDICTED: Musca domestica putative fatty acyl-CoA reductase CG8306 (LOC101892601), mRNA                        | XM_005176941.3 | -1.22 | 2.26354E-05 |
| PREDICTED: Musca domestica putative fatty acyl-CoA reductase CG8306 (LOC101892601), mRNA                        | XM_005176941.3 | -1.22 | 2.26354E-05 |
| PREDICTED: Musca domestica fatty acid synthase (LOC101888614), mRNA                                             | XM_020038884.1 | -1.10 | 0.09881781  |
| PREDICTED: Musca domestica cytochrome P450 4g1 (LOC101889105), mRNA                                             | XM_005176301.3 | -0.99 | 0.397097265 |
| PREDICTED: Musca domestica putative fatty acyl-CoA reductase CG5065 (LOC101895587), transcript variant X1, mRNA | XM_005175979.3 | -0.95 | 0.610179693 |
| PREDICTED: Musca domestica putative fatty acyl-CoA reductase CG5065 (LOC101895795), transcript variant X1, mRNA | XM_005188297.3 | -0.74 | 0.818216359 |
| PREDICTED: acyl-CoA Delta(11) desaturase [Musca domestica]                                                      | XM_020037334.1 | -0.74 | 0.223020832 |
| PREDICTED: Musca domestica putative fatty acyl-CoA reductase CG5065 (LOC101889437), mRNA                        | XM_005189195.3 | -0.42 | 0.8363287   |
| PREDICTED: acyl-CoA Delta(11) desaturase [Musca domestica]                                                      | XM_005185155.3 | -0.31 | 0.604796698 |
| PREDICTED: Musca domestica fatty acyl-CoA reductase wat (LOC101898132), mRNA                                    | XM_005180048.3 | -0.23 | 0.806483462 |
| PREDICTED: acetyl-CoA carboxylase isoform X2 [Musca domestica]                                                  | XM_020036197.1 | -0.20 | 0.876850597 |
| PREDICTED: Musca domestica fatty acyl-CoA reductase wat (LOC101889946), mRNA                                    | XM_005189198.3 | -0.04 | 0.960622847 |
| PREDICTED: Musca domestica cytochrome P450 4g1-like (LOC101888923), mRNA                                        | XM_005176300.3 | 0.00  | 1           |
| PREDICTED: Musca domestica farnesyl pyrophosphate synthase (LOC101895546), mRNA                                 | XM_005182378.3 | 0.03  | 0.948399537 |
| PREDICTED: acetyl-CoA carboxylase isoform X3 [Musca domestica]                                                  | XM_011293553.2 | 0.06  | 0.952812318 |
| PREDICTED: Musca domestica putative fatty acyl-CoA reductase CG5065 (LOC101895795), transcript variant X3, mRNA | XM_020038489.1 | 0.10  | 0.99267009  |
| PREDICTED: Musca domestica putative fatty acyl-CoA reductase CG5065 (LOC101895795), transcript variant X4, mRNA | XM_011296189.2 | 0.38  | 0.893147991 |
| PREDICTED: Musca domestica fatty acid synthase (LOC101893120), mRNA                                             | XM_005175727.3 | 0.41  | 0.886139873 |
| PREDICTED: Musca domestica putative fatty acyl-CoA reductase CG5065 (LOC101900323), mRNA                        | XM_011293999.2 | 0.64  | 0.772041035 |

**Supplementary table 6. Housefly gene expression of selected cuticular hydrocarbon biosynthesis related genes.** Tables are sorted by log<sub>2</sub> Fold Change. Top table: Late *E. muscae* sporulating female house flies compared to late uninfected control female house flies. Bottom table: Early sporulation *E. muscae* female house flies compared to early uninfected control female house flies.

### **Supplementary video 1**

[https://sid.erda.dk/share\\_redirect/hIekF7iOhD](https://sid.erda.dk/share_redirect/hIekF7iOhD)

Timelapse video of sporulating female house fly. The video spans 24 hours.

To view video: Follow the link. This will download the videofile.  
This file can be played with a media player (tested with VLC media player & Windows media player).

### **Supplementary video 2**

[https://sid.erda.dk/share\\_redirect/bJf0Bner0Q](https://sid.erda.dk/share_redirect/bJf0Bner0Q)

Video of escaped house flies feeding off conidia on a petri dish lid and bottom. The conidia can be seen as a white powder-like substance in the top of the lid.

To view video: Follow the link. This will download the videofile.  
This file can be played with a media player (tested with VLC media player & Windows media player).
